# Supplementary material for: Prediction of Effective Drug Combinations by Chemical Interaction, Protein Interaction and Target Enrichment of KEGG Pathways
Source: Hindawi journal article supplement (doi:10.1155/2013/723780), 2013-01-01
Supplement: f1 [file 723780.f1.pdf]

**Supplementary Material I:** The benchmark dataset consisted of 726 combinations, of which 121 were positive combinations and 605 were negative combinations.

| <b>Index</b> | <b>Drug #1</b> | <b>Drug #2</b> | <b>Positive or Negative</b> |
|--------------|----------------|----------------|-----------------------------|
| 1            | D00236         | D02487         | Positive                    |
| 2            | D00475         | D00570         | Positive                    |
| 3            | D00848         | D02272         | Positive                    |
| 4            | D00217         | D03182         | Positive                    |
| 5            | D00340         | D00626         | Positive                    |
| 6            | D00023         | D00165         | Positive                    |
| 7            | D01024         | D03820         | Positive                    |
| 8            | D00251         | D00340         | Positive                    |
| 9            | D00554         | D01294         | Positive                    |
| 10           | D00340         | D00627         | Positive                    |
| 11           | D00683         | D02212         | Positive                    |
| 12           | D00593         | D00945         | Positive                    |
| 13           | D00432         | D00650         | Positive                    |
| 14           | D00485         | D00970         | Positive                    |
| 15           | D00340         | D00400         | Positive                    |
| 16           | D00340         | D00362         | Positive                    |
| 17           | D00554         | D00950         | Positive                    |
| 18           | D00267         | D00809         | Positive                    |
| 19           | D00126         | D00847         | Positive                    |
| 20           | D00615         | D06412         | Positive                    |
| 21           | D01450         | D02149         | Positive                    |
| 22           | D00455         | D01203         | Positive                    |
| 23           | D00454         | D00823         | Positive                    |
| 24           | D00358         | D00551         | Positive                    |
| 25           | D00340         | D01204         | Positive                    |
| 26           | D00340         | D02082         | Positive                    |
| 27           | D00679         | D01453         | Positive                    |
| 28           | D00113         | D00469         | Positive                    |
| 29           | D00944         | D08996         | Positive                    |
| 30           | D00340         | D01302         | Positive                    |
| 31           | D00842         | D02095         | Positive                    |
| 32           | D01413         | D03799         | Positive                    |
| 33           | D00105         | D00953         | Positive                    |
| 34           | D00126         | D00511         | Positive                    |
| 35           | D00217         | D00847         | Positive                    |
| 36           | D00554         | D03917         | Positive                    |
| 37           | D00400         | D06412         | Positive                    |
| 38           | D00516         | D01302         | Positive                    |

|    |        |        |          |
|----|--------|--------|----------|
| 39 | D00480 | D02101 | Positive |
| 40 | D00554 | D00953 | Positive |
| 41 | D00615 | D00887 | Positive |
| 42 | D00603 | D02076 | Positive |
| 43 | D00340 | D00459 | Positive |
| 44 | D00335 | D00944 | Positive |
| 45 | D00340 | D00357 | Positive |
| 46 | D00480 | D00848 | Positive |
| 47 | D00182 | D00575 | Positive |
| 48 | D00109 | D00847 | Positive |
| 49 | D00088 | D02216 | Positive |
| 50 | D00615 | D00627 | Positive |
| 51 | D00554 | D05205 | Positive |
| 52 | D00336 | D00944 | Positive |
| 53 | D00554 | D04104 | Positive |
| 54 | D00235 | D00272 | Positive |
| 55 | D00272 | D00604 | Positive |
| 56 | D00503 | D00809 | Positive |
| 57 | D00049 | D00434 | Positive |
| 58 | D00211 | D00346 | Positive |
| 59 | D00095 | D02086 | Positive |
| 60 | D00217 | D02101 | Positive |
| 61 | D00246 | D05277 | Positive |
| 62 | D00186 | D02216 | Positive |
| 63 | D01066 | D03048 | Positive |
| 64 | D00687 | D01708 | Positive |
| 65 | D00554 | D02367 | Positive |
| 66 | D00340 | D00523 | Positive |
| 67 | D00944 | D06645 | Positive |
| 68 | D00182 | D00554 | Positive |
| 69 | D00340 | D00634 | Positive |
| 70 | D00340 | D00623 | Positive |
| 71 | D00105 | D00950 | Positive |
| 72 | D00603 | D00653 | Positive |
| 73 | D01066 | D06236 | Positive |
| 74 | D00554 | D05209 | Positive |
| 75 | D00088 | D00222 | Positive |
| 76 | D00105 | D03917 | Positive |
| 77 | D00340 | D00405 | Positive |
| 78 | D00594 | D00944 | Positive |
| 79 | D00340 | D00386 | Positive |
| 80 | D00593 | D00596 | Positive |
| 81 | D00511 | D01002 | Positive |

|     |        |        |          |
|-----|--------|--------|----------|
| 82  | D00340 | D00483 | Positive |
| 83  | D00118 | D01984 | Positive |
| 84  | D01340 | D02227 | Positive |
| 85  | D00738 | D02388 | Positive |
| 86  | D00340 | D06412 | Positive |
| 87  | D00059 | D00558 | Positive |
| 88  | D00615 | D01204 | Positive |
| 89  | D00383 | D00619 | Positive |
| 90  | D00109 | D00302 | Positive |
| 91  | D00690 | D01373 | Positive |
| 92  | D00358 | D00553 | Positive |
| 93  | D00596 | D00944 | Positive |
| 94  | D00217 | D00482 | Positive |
| 95  | D00340 | D00443 | Positive |
| 96  | D00217 | D02227 | Positive |
| 97  | D00400 | D00615 | Positive |
| 98  | D00480 | D00511 | Positive |
| 99  | D00972 | D01402 | Positive |
| 100 | D00126 | D00485 | Positive |
| 101 | D00282 | D01637 | Positive |
| 102 | D00105 | D05209 | Positive |
| 103 | D00615 | D00620 | Positive |
| 104 | D02069 | D03860 | Positive |
| 105 | D00419 | D00904 | Positive |
| 106 | D00944 | D00945 | Positive |
| 107 | D07132 | D08249 | Positive |
| 108 | D00217 | D01355 | Positive |
| 109 | D00186 | D00292 | Positive |
| 110 | D00434 | D01966 | Positive |
| 111 | D00665 | D05649 | Positive |
| 112 | D00109 | D00402 | Positive |
| 113 | D00340 | D00649 | Positive |
| 114 | D00340 | D00620 | Positive |
| 115 | D00188 | D00939 | Positive |
| 116 | D00994 | D02069 | Positive |
| 117 | D00676 | D00970 | Positive |
| 118 | D00049 | D00359 | Positive |
| 119 | D00340 | D00621 | Positive |
| 120 | D00340 | D07992 | Positive |
| 121 | D00217 | D05632 | Positive |
| 122 | D00023 | D00217 | Negative |
| 123 | D00023 | D00335 | Negative |
| 124 | D00023 | D00848 | Negative |

|     |        |        |          |
|-----|--------|--------|----------|
| 125 | D00023 | D01002 | Negative |
| 126 | D00023 | D01966 | Negative |
| 127 | D00023 | D02388 | Negative |
| 128 | D00049 | D00634 | Negative |
| 129 | D00049 | D00665 | Negative |
| 130 | D00049 | D00676 | Negative |
| 131 | D00049 | D01302 | Negative |
| 132 | D00049 | D02082 | Negative |
| 133 | D00049 | D03182 | Negative |
| 134 | D00059 | D00236 | Negative |
| 135 | D00059 | D00282 | Negative |
| 136 | D00059 | D00480 | Negative |
| 137 | D00059 | D00553 | Negative |
| 138 | D00059 | D00679 | Negative |
| 139 | D00059 | D00729 | Negative |
| 140 | D00059 | D00945 | Negative |
| 141 | D00059 | D02076 | Negative |
| 142 | D00059 | D02483 | Negative |
| 143 | D00068 | D00145 | Negative |
| 144 | D00068 | D00292 | Negative |
| 145 | D00068 | D00346 | Negative |
| 146 | D00068 | D00604 | Negative |
| 147 | D00068 | D00743 | Negative |
| 148 | D00068 | D00823 | Negative |
| 149 | D00068 | D02101 | Negative |
| 150 | D00068 | D03799 | Negative |
| 151 | D00068 | D05649 | Negative |
| 152 | D00088 | D00626 | Negative |
| 153 | D00088 | D00665 | Negative |
| 154 | D00088 | D00944 | Negative |
| 155 | D00088 | D06412 | Negative |
| 156 | D00094 | D00402 | Negative |
| 157 | D00094 | D00419 | Negative |
| 158 | D00094 | D00945 | Negative |
| 159 | D00094 | D01302 | Negative |
| 160 | D00094 | D01413 | Negative |
| 161 | D00095 | D00386 | Negative |
| 162 | D00095 | D00649 | Negative |
| 163 | D00095 | D00809 | Negative |
| 164 | D00095 | D01966 | Negative |
| 165 | D00105 | D00113 | Negative |
| 166 | D00105 | D00251 | Negative |
| 167 | D00105 | D00432 | Negative |

|     |        |        |          |
|-----|--------|--------|----------|
| 168 | D00105 | D00939 | Negative |
| 169 | D00105 | D01413 | Negative |
| 170 | D00105 | D02060 | Negative |
| 171 | D00105 | D02149 | Negative |
| 172 | D00109 | D00419 | Negative |
| 173 | D00109 | D00443 | Negative |
| 174 | D00109 | D00554 | Negative |
| 175 | D00109 | D00981 | Negative |
| 176 | D00109 | D01450 | Negative |
| 177 | D00109 | D01708 | Negative |
| 178 | D00109 | D02272 | Negative |
| 179 | D00109 | D06236 | Negative |
| 180 | D00109 | D08127 | Negative |
| 181 | D00113 | D00397 | Negative |
| 182 | D00113 | D00604 | Negative |
| 183 | D00113 | D01002 | Negative |
| 184 | D00113 | D01066 | Negative |
| 185 | D00113 | D02149 | Negative |
| 186 | D00113 | D02216 | Negative |
| 187 | D00113 | D02487 | Negative |
| 188 | D00118 | D00246 | Negative |
| 189 | D00118 | D00434 | Negative |
| 190 | D00118 | D00980 | Negative |
| 191 | D00118 | D05632 | Negative |
| 192 | D00118 | D08127 | Negative |
| 193 | D00126 | D00165 | Negative |
| 194 | D00126 | D00282 | Negative |
| 195 | D00126 | D00405 | Negative |
| 196 | D00126 | D00475 | Negative |
| 197 | D00126 | D00621 | Negative |
| 198 | D00126 | D00904 | Negative |
| 199 | D00145 | D00362 | Negative |
| 200 | D00145 | D00683 | Negative |
| 201 | D00145 | D00823 | Negative |
| 202 | D00145 | D01413 | Negative |
| 203 | D00145 | D01450 | Negative |
| 204 | D00145 | D05632 | Negative |
| 205 | D00145 | D08996 | Negative |
| 206 | D00165 | D00182 | Negative |
| 207 | D00165 | D00222 | Negative |
| 208 | D00165 | D00383 | Negative |
| 209 | D00165 | D01112 | Negative |
| 210 | D00165 | D01204 | Negative |

|     |        |        |          |
|-----|--------|--------|----------|
| 211 | D00165 | D02095 | Negative |
| 212 | D00165 | D02272 | Negative |
| 213 | D00165 | D05649 | Negative |
| 214 | D00182 | D00405 | Negative |
| 215 | D00182 | D01204 | Negative |
| 216 | D00182 | D03799 | Negative |
| 217 | D00182 | D04104 | Negative |
| 218 | D00182 | D05632 | Negative |
| 219 | D00186 | D00246 | Negative |
| 220 | D00186 | D00397 | Negative |
| 221 | D00186 | D00596 | Negative |
| 222 | D00186 | D00634 | Negative |
| 223 | D00186 | D00687 | Negative |
| 224 | D00186 | D00823 | Negative |
| 225 | D00186 | D00983 | Negative |
| 226 | D00186 | D01373 | Negative |
| 227 | D00186 | D01450 | Negative |
| 228 | D00186 | D01637 | Negative |
| 229 | D00186 | D02149 | Negative |
| 230 | D00186 | D02272 | Negative |
| 231 | D00186 | D02487 | Negative |
| 232 | D00186 | D03048 | Negative |
| 233 | D00186 | D05277 | Negative |
| 234 | D00186 | D08249 | Negative |
| 235 | D00188 | D00397 | Negative |
| 236 | D00188 | D00729 | Negative |
| 237 | D00188 | D00848 | Negative |
| 238 | D00188 | D00972 | Negative |
| 239 | D00188 | D01413 | Negative |
| 240 | D00188 | D03917 | Negative |
| 241 | D00211 | D00336 | Negative |
| 242 | D00211 | D00523 | Negative |
| 243 | D00211 | D00554 | Negative |
| 244 | D00211 | D00729 | Negative |
| 245 | D00211 | D02483 | Negative |
| 246 | D00211 | D03799 | Negative |
| 247 | D00211 | D06645 | Negative |
| 248 | D00217 | D00222 | Negative |
| 249 | D00217 | D00236 | Negative |
| 250 | D00217 | D00397 | Negative |
| 251 | D00217 | D00455 | Negative |
| 252 | D00217 | D00743 | Negative |
| 253 | D00217 | D00970 | Negative |

|     |        |        |          |
|-----|--------|--------|----------|
| 254 | D00217 | D01402 | Negative |
| 255 | D00217 | D01708 | Negative |
| 256 | D00217 | D02060 | Negative |
| 257 | D00217 | D07132 | Negative |
| 258 | D00217 | D08249 | Negative |
| 259 | D00222 | D00267 | Negative |
| 260 | D00222 | D00397 | Negative |
| 261 | D00222 | D00443 | Negative |
| 262 | D00222 | D00455 | Negative |
| 263 | D00222 | D00523 | Negative |
| 264 | D00222 | D00551 | Negative |
| 265 | D00222 | D00623 | Negative |
| 266 | D00222 | D00653 | Negative |
| 267 | D00222 | D00676 | Negative |
| 268 | D00222 | D01340 | Negative |
| 269 | D00222 | D02227 | Negative |
| 270 | D00222 | D05277 | Negative |
| 271 | D00235 | D00402 | Negative |
| 272 | D00235 | D00615 | Negative |
| 273 | D00235 | D01294 | Negative |
| 274 | D00235 | D02076 | Negative |
| 275 | D00235 | D02082 | Negative |
| 276 | D00236 | D00346 | Negative |
| 277 | D00236 | D00634 | Negative |
| 278 | D00236 | D00653 | Negative |
| 279 | D00246 | D00383 | Negative |
| 280 | D00246 | D00516 | Negative |
| 281 | D00246 | D00604 | Negative |
| 282 | D00246 | D00738 | Negative |
| 283 | D00246 | D00842 | Negative |
| 284 | D00246 | D01450 | Negative |
| 285 | D00246 | D02194 | Negative |
| 286 | D00246 | D05209 | Negative |
| 287 | D00251 | D00282 | Negative |
| 288 | D00251 | D00554 | Negative |
| 289 | D00251 | D00620 | Negative |
| 290 | D00251 | D00626 | Negative |
| 291 | D00251 | D00679 | Negative |
| 292 | D00251 | D00887 | Negative |
| 293 | D00251 | D01302 | Negative |
| 294 | D00267 | D00302 | Negative |
| 295 | D00267 | D00455 | Negative |
| 296 | D00267 | D00528 | Negative |

|     |        |        |          |
|-----|--------|--------|----------|
| 297 | D00267 | D00690 | Negative |
| 298 | D00267 | D00729 | Negative |
| 299 | D00267 | D00945 | Negative |
| 300 | D00267 | D01002 | Negative |
| 301 | D00267 | D03048 | Negative |
| 302 | D00267 | D03820 | Negative |
| 303 | D00272 | D00459 | Negative |
| 304 | D00272 | D00558 | Negative |
| 305 | D00272 | D00627 | Negative |
| 306 | D00272 | D00847 | Negative |
| 307 | D00282 | D00847 | Negative |
| 308 | D00282 | D02082 | Negative |
| 309 | D00282 | D05209 | Negative |
| 310 | D00282 | D08996 | Negative |
| 311 | D00292 | D00443 | Negative |
| 312 | D00292 | D00593 | Negative |
| 313 | D00292 | D02095 | Negative |
| 314 | D00292 | D08205 | Negative |
| 315 | D00302 | D00335 | Negative |
| 316 | D00302 | D00359 | Negative |
| 317 | D00302 | D00455 | Negative |
| 318 | D00302 | D00953 | Negative |
| 319 | D00302 | D01373 | Negative |
| 320 | D00302 | D02367 | Negative |
| 321 | D00335 | D00469 | Negative |
| 322 | D00335 | D00516 | Negative |
| 323 | D00335 | D00558 | Negative |
| 324 | D00335 | D02082 | Negative |
| 325 | D00335 | D02227 | Negative |
| 326 | D00336 | D00346 | Negative |
| 327 | D00336 | D00482 | Negative |
| 328 | D00336 | D00650 | Negative |
| 329 | D00336 | D00738 | Negative |
| 330 | D00340 | D00397 | Negative |
| 331 | D00340 | D01689 | Negative |
| 332 | D00340 | D07132 | Negative |
| 333 | D00346 | D00455 | Negative |
| 334 | D00346 | D00485 | Negative |
| 335 | D00346 | D00676 | Negative |
| 336 | D00346 | D02227 | Negative |
| 337 | D00357 | D00402 | Negative |
| 338 | D00357 | D00469 | Negative |
| 339 | D00357 | D00558 | Negative |



|     |        |        |          |
|-----|--------|--------|----------|
| 340 | D00357 | D00570 | Negative |
| 341 | D00357 | D01373 | Negative |
| 342 | D00357 | D02101 | Negative |
| 343 | D00357 | D02272 | Negative |
| 344 | D00358 | D00604 | Negative |
| 345 | D00358 | D00634 | Negative |
| 346 | D00358 | D00683 | Negative |
| 347 | D00358 | D00729 | Negative |
| 348 | D00358 | D01066 | Negative |
| 349 | D00359 | D00432 | Negative |
| 350 | D00359 | D00485 | Negative |
| 351 | D00359 | D00981 | Negative |
| 352 | D00359 | D01984 | Negative |
| 353 | D00359 | D02082 | Negative |
| 354 | D00359 | D07992 | Negative |
| 355 | D00362 | D00419 | Negative |
| 356 | D00362 | D00842 | Negative |
| 357 | D00362 | D00904 | Negative |
| 358 | D00362 | D00970 | Negative |
| 359 | D00362 | D01355 | Negative |
| 360 | D00362 | D02149 | Negative |
| 361 | D00362 | D03917 | Negative |
| 362 | D00362 | D06412 | Negative |
| 363 | D00383 | D00653 | Negative |
| 364 | D00383 | D00687 | Negative |
| 365 | D00383 | D00939 | Negative |
| 366 | D00383 | D00981 | Negative |
| 367 | D00383 | D02076 | Negative |
| 368 | D00383 | D04104 | Negative |
| 369 | D00383 | D08127 | Negative |
| 370 | D00386 | D00950 | Negative |
| 371 | D00386 | D00980 | Negative |
| 372 | D00386 | D00994 | Negative |
| 373 | D00386 | D02069 | Negative |
| 374 | D00386 | D08996 | Negative |
| 375 | D00397 | D00475 | Negative |
| 376 | D00397 | D00511 | Negative |
| 377 | D00397 | D01294 | Negative |
| 378 | D00400 | D00443 | Negative |
| 379 | D00400 | D00483 | Negative |
| 380 | D00400 | D00485 | Negative |
| 381 | D00400 | D00553 | Negative |
| 382 | D00400 | D00676 | Negative |

|     |        |        |          |
|-----|--------|--------|----------|
| 383 | D00400 | D02101 | Negative |
| 384 | D00400 | D03820 | Negative |
| 385 | D00402 | D00469 | Negative |
| 386 | D00402 | D00570 | Negative |
| 387 | D00402 | D00972 | Negative |
| 388 | D00402 | D02076 | Negative |
| 389 | D00402 | D03182 | Negative |
| 390 | D00405 | D00482 | Negative |
| 391 | D00405 | D00554 | Negative |
| 392 | D00405 | D01637 | Negative |
| 393 | D00419 | D00482 | Negative |
| 394 | D00419 | D00483 | Negative |
| 395 | D00419 | D00634 | Negative |
| 396 | D00419 | D01002 | Negative |
| 397 | D00419 | D01112 | Negative |
| 398 | D00419 | D05277 | Negative |
| 399 | D00432 | D00570 | Negative |
| 400 | D00432 | D00687 | Negative |
| 401 | D00432 | D00904 | Negative |
| 402 | D00432 | D01413 | Negative |
| 403 | D00432 | D01689 | Negative |
| 404 | D00434 | D00516 | Negative |
| 405 | D00434 | D00626 | Negative |
| 406 | D00434 | D00627 | Negative |
| 407 | D00434 | D00994 | Negative |
| 408 | D00434 | D02212 | Negative |
| 409 | D00434 | D06645 | Negative |
| 410 | D00443 | D00469 | Negative |
| 411 | D00443 | D00575 | Negative |
| 412 | D00443 | D04104 | Negative |
| 413 | D00454 | D00551 | Negative |
| 414 | D00454 | D00738 | Negative |
| 415 | D00454 | D00887 | Negative |
| 416 | D00454 | D00950 | Negative |
| 417 | D00454 | D02060 | Negative |
| 418 | D00455 | D00626 | Negative |
| 419 | D00455 | D00944 | Negative |
| 420 | D00455 | D01002 | Negative |
| 421 | D00455 | D01112 | Negative |
| 422 | D00455 | D02194 | Negative |
| 423 | D00455 | D06236 | Negative |
| 424 | D00459 | D00551 | Negative |
| 425 | D00459 | D00738 | Negative |

|     |        |        |          |
|-----|--------|--------|----------|
| 426 | D00459 | D01453 | Negative |
| 427 | D00459 | D02227 | Negative |
| 428 | D00459 | D02388 | Negative |
| 429 | D00469 | D00623 | Negative |
| 430 | D00469 | D00887 | Negative |
| 431 | D00469 | D01002 | Negative |
| 432 | D00469 | D01355 | Negative |
| 433 | D00469 | D02060 | Negative |
| 434 | D00469 | D02367 | Negative |
| 435 | D00475 | D00649 | Negative |
| 436 | D00475 | D00939 | Negative |
| 437 | D00475 | D01002 | Negative |
| 438 | D00475 | D02388 | Negative |
| 439 | D00475 | D03820 | Negative |
| 440 | D00475 | D03917 | Negative |
| 441 | D00475 | D05632 | Negative |
| 442 | D00480 | D00528 | Negative |
| 443 | D00480 | D00593 | Negative |
| 444 | D00480 | D00604 | Negative |
| 445 | D00480 | D01966 | Negative |
| 446 | D00480 | D02212 | Negative |
| 447 | D00480 | D05632 | Negative |
| 448 | D00480 | D07132 | Negative |
| 449 | D00482 | D00980 | Negative |
| 450 | D00482 | D01066 | Negative |
| 451 | D00482 | D02082 | Negative |
| 452 | D00482 | D02227 | Negative |
| 453 | D00482 | D07132 | Negative |
| 454 | D00483 | D00570 | Negative |
| 455 | D00483 | D00615 | Negative |
| 456 | D00483 | D00650 | Negative |
| 457 | D00483 | D00887 | Negative |
| 458 | D00483 | D02082 | Negative |
| 459 | D00483 | D02388 | Negative |
| 460 | D00483 | D03820 | Negative |
| 461 | D00485 | D00594 | Negative |
| 462 | D00485 | D00653 | Negative |
| 463 | D00485 | D02101 | Negative |
| 464 | D00503 | D00570 | Negative |
| 465 | D00503 | D01294 | Negative |
| 466 | D00503 | D01689 | Negative |
| 467 | D00503 | D05649 | Negative |
| 468 | D00511 | D00575 | Negative |

|     |        |        |          |
|-----|--------|--------|----------|
| 469 | D00511 | D00980 | Negative |
| 470 | D00511 | D01984 | Negative |
| 471 | D00516 | D00523 | Negative |
| 472 | D00516 | D00980 | Negative |
| 473 | D00516 | D03048 | Negative |
| 474 | D00516 | D06236 | Negative |
| 475 | D00523 | D00809 | Negative |
| 476 | D00523 | D00823 | Negative |
| 477 | D00523 | D00939 | Negative |
| 478 | D00523 | D00970 | Negative |
| 479 | D00523 | D01302 | Negative |
| 480 | D00523 | D02388 | Negative |
| 481 | D00528 | D00634 | Negative |
| 482 | D00528 | D00944 | Negative |
| 483 | D00528 | D00953 | Negative |
| 484 | D00551 | D00620 | Negative |
| 485 | D00551 | D00679 | Negative |
| 486 | D00551 | D02076 | Negative |
| 487 | D00551 | D08205 | Negative |
| 488 | D00553 | D00596 | Negative |
| 489 | D00553 | D00847 | Negative |
| 490 | D00553 | D00848 | Negative |
| 491 | D00553 | D01373 | Negative |
| 492 | D00553 | D02227 | Negative |
| 493 | D00553 | D05209 | Negative |
| 494 | D00553 | D08205 | Negative |
| 495 | D00554 | D00842 | Negative |
| 496 | D00554 | D02483 | Negative |
| 497 | D00554 | D07132 | Negative |
| 498 | D00558 | D01373 | Negative |
| 499 | D00558 | D01966 | Negative |
| 500 | D00558 | D05277 | Negative |
| 501 | D00558 | D07132 | Negative |
| 502 | D00570 | D00575 | Negative |
| 503 | D00570 | D00634 | Negative |
| 504 | D00570 | D00683 | Negative |
| 505 | D00570 | D00687 | Negative |
| 506 | D00570 | D00950 | Negative |
| 507 | D00575 | D02194 | Negative |
| 508 | D00575 | D08205 | Negative |
| 509 | D00593 | D00653 | Negative |
| 510 | D00593 | D00676 | Negative |
| 511 | D00593 | D01203 | Negative |

|     |        |        |          |
|-----|--------|--------|----------|
| 512 | D00593 | D01340 | Negative |
| 513 | D00594 | D00676 | Negative |
| 514 | D00594 | D00887 | Negative |
| 515 | D00594 | D00970 | Negative |
| 516 | D00594 | D01066 | Negative |
| 517 | D00594 | D01966 | Negative |
| 518 | D00594 | D02086 | Negative |
| 519 | D00594 | D06645 | Negative |
| 520 | D00594 | D08131 | Negative |
| 521 | D00603 | D00620 | Negative |
| 522 | D00603 | D00743 | Negative |
| 523 | D00603 | D08249 | Negative |
| 524 | D00604 | D01066 | Negative |
| 525 | D00604 | D01204 | Negative |
| 526 | D00604 | D02483 | Negative |
| 527 | D00604 | D03917 | Negative |
| 528 | D00615 | D00848 | Negative |
| 529 | D00615 | D01373 | Negative |
| 530 | D00615 | D01413 | Negative |
| 531 | D00615 | D01453 | Negative |
| 532 | D00615 | D01984 | Negative |
| 533 | D00615 | D02194 | Negative |
| 534 | D00615 | D03182 | Negative |
| 535 | D00615 | D03799 | Negative |
| 536 | D00615 | D07132 | Negative |
| 537 | D00615 | D08127 | Negative |
| 538 | D00619 | D00620 | Negative |
| 539 | D00619 | D00970 | Negative |
| 540 | D00619 | D02086 | Negative |
| 541 | D00620 | D01024 | Negative |
| 542 | D00620 | D05632 | Negative |
| 543 | D00620 | D06645 | Negative |
| 544 | D00621 | D00994 | Negative |
| 545 | D00623 | D00650 | Negative |
| 546 | D00623 | D00945 | Negative |
| 547 | D00623 | D01966 | Negative |
| 548 | D00623 | D02076 | Negative |
| 549 | D00623 | D02367 | Negative |
| 550 | D00623 | D03048 | Negative |
| 551 | D00623 | D08249 | Negative |
| 552 | D00626 | D02149 | Negative |
| 553 | D00626 | D03048 | Negative |
| 554 | D00626 | D03182 | Negative |

|     |        |        |          |
|-----|--------|--------|----------|
| 555 | D00626 | D03820 | Negative |
| 556 | D00627 | D00848 | Negative |
| 557 | D00627 | D00983 | Negative |
| 558 | D00627 | D01708 | Negative |
| 559 | D00627 | D07992 | Negative |
| 560 | D00634 | D00847 | Negative |
| 561 | D00634 | D01355 | Negative |
| 562 | D00634 | D02216 | Negative |
| 563 | D00634 | D03860 | Negative |
| 564 | D00634 | D05277 | Negative |
| 565 | D00649 | D01066 | Negative |
| 566 | D00649 | D02060 | Negative |
| 567 | D00649 | D03799 | Negative |
| 568 | D00650 | D00743 | Negative |
| 569 | D00650 | D01413 | Negative |
| 570 | D00653 | D00970 | Negative |
| 571 | D00653 | D01294 | Negative |
| 572 | D00653 | D05205 | Negative |
| 573 | D00653 | D06236 | Negative |
| 574 | D00665 | D00690 | Negative |
| 575 | D00665 | D00809 | Negative |
| 576 | D00665 | D01373 | Negative |
| 577 | D00665 | D02227 | Negative |
| 578 | D00665 | D02367 | Negative |
| 579 | D00665 | D02483 | Negative |
| 580 | D00665 | D08249 | Negative |
| 581 | D00676 | D00953 | Negative |
| 582 | D00676 | D00980 | Negative |
| 583 | D00676 | D01708 | Negative |
| 584 | D00676 | D02227 | Negative |
| 585 | D00679 | D02082 | Negative |
| 586 | D00679 | D02272 | Negative |
| 587 | D00679 | D06412 | Negative |
| 588 | D00679 | D06645 | Negative |
| 589 | D00687 | D00970 | Negative |
| 590 | D00687 | D01373 | Negative |
| 591 | D00687 | D02212 | Negative |
| 592 | D00687 | D03048 | Negative |
| 593 | D00690 | D00980 | Negative |
| 594 | D00690 | D01002 | Negative |
| 595 | D00690 | D01413 | Negative |
| 596 | D00690 | D03860 | Negative |
| 597 | D00690 | D03917 | Negative |

|     |        |        |          |
|-----|--------|--------|----------|
| 598 | D00729 | D01002 | Negative |
| 599 | D00729 | D02060 | Negative |
| 600 | D00729 | D02487 | Negative |
| 601 | D00729 | D06412 | Negative |
| 602 | D00729 | D08205 | Negative |
| 603 | D00738 | D00743 | Negative |
| 604 | D00738 | D00944 | Negative |
| 605 | D00738 | D08127 | Negative |
| 606 | D00743 | D00847 | Negative |
| 607 | D00743 | D00981 | Negative |
| 608 | D00743 | D02082 | Negative |
| 609 | D00743 | D02095 | Negative |
| 610 | D00823 | D00994 | Negative |
| 611 | D00823 | D02216 | Negative |
| 612 | D00823 | D02227 | Negative |
| 613 | D00823 | D03860 | Negative |
| 614 | D00823 | D04104 | Negative |
| 615 | D00842 | D01689 | Negative |
| 616 | D00842 | D02076 | Negative |
| 617 | D00847 | D00939 | Negative |
| 618 | D00847 | D00945 | Negative |
| 619 | D00847 | D02076 | Negative |
| 620 | D00847 | D02082 | Negative |
| 621 | D00848 | D00980 | Negative |
| 622 | D00848 | D00981 | Negative |
| 623 | D00848 | D01984 | Negative |
| 624 | D00887 | D00970 | Negative |
| 625 | D00887 | D02367 | Negative |
| 626 | D00887 | D05277 | Negative |
| 627 | D00904 | D00953 | Negative |
| 628 | D00904 | D02060 | Negative |
| 629 | D00904 | D05205 | Negative |
| 630 | D00904 | D08996 | Negative |
| 631 | D00939 | D00994 | Negative |
| 632 | D00939 | D01302 | Negative |
| 633 | D00939 | D01453 | Negative |
| 634 | D00939 | D01637 | Negative |
| 635 | D00939 | D02367 | Negative |
| 636 | D00944 | D01204 | Negative |
| 637 | D00944 | D02212 | Negative |
| 638 | D00944 | D03860 | Negative |
| 639 | D00944 | D05205 | Negative |
| 640 | D00944 | D07132 | Negative |

|     |        |        |          |
|-----|--------|--------|----------|
| 641 | D00945 | D00953 | Negative |
| 642 | D00945 | D00980 | Negative |
| 643 | D00945 | D01402 | Negative |
| 644 | D00950 | D00972 | Negative |
| 645 | D00950 | D01413 | Negative |
| 646 | D00950 | D05209 | Negative |
| 647 | D00950 | D08127 | Negative |
| 648 | D00950 | D08996 | Negative |
| 649 | D00953 | D00970 | Negative |
| 650 | D00953 | D01002 | Negative |
| 651 | D00970 | D01066 | Negative |
| 652 | D00970 | D02101 | Negative |
| 653 | D00970 | D08127 | Negative |
| 654 | D00972 | D01373 | Negative |
| 655 | D00972 | D02101 | Negative |
| 656 | D00980 | D00994 | Negative |
| 657 | D00980 | D01204 | Negative |
| 658 | D00983 | D01204 | Negative |
| 659 | D00983 | D01294 | Negative |
| 660 | D00983 | D01689 | Negative |
| 661 | D00983 | D02194 | Negative |
| 662 | D00983 | D07132 | Negative |
| 663 | D00994 | D01302 | Negative |
| 664 | D01002 | D01637 | Negative |
| 665 | D01002 | D02095 | Negative |
| 666 | D01002 | D08205 | Negative |
| 667 | D01002 | D08249 | Negative |
| 668 | D01066 | D01112 | Negative |
| 669 | D01066 | D01453 | Negative |
| 670 | D01066 | D07992 | Negative |
| 671 | D01112 | D01302 | Negative |
| 672 | D01112 | D01689 | Negative |
| 673 | D01112 | D02095 | Negative |
| 674 | D01112 | D06412 | Negative |
| 675 | D01203 | D01355 | Negative |
| 676 | D01204 | D01302 | Negative |
| 677 | D01204 | D02086 | Negative |
| 678 | D01204 | D02216 | Negative |
| 679 | D01204 | D03860 | Negative |
| 680 | D01294 | D01984 | Negative |
| 681 | D01294 | D02060 | Negative |
| 682 | D01294 | D06236 | Negative |
| 683 | D01294 | D07132 | Negative |



|     |        |        |          |
|-----|--------|--------|----------|
| 684 | D01302 | D01453 | Negative |
| 685 | D01302 | D05277 | Negative |
| 686 | D01302 | D06236 | Negative |
| 687 | D01302 | D08131 | Negative |
| 688 | D01340 | D08205 | Negative |
| 689 | D01355 | D01453 | Negative |
| 690 | D01402 | D02487 | Negative |
| 691 | D01450 | D05205 | Negative |
| 692 | D01453 | D02060 | Negative |
| 693 | D01637 | D02082 | Negative |
| 694 | D01637 | D02227 | Negative |
| 695 | D01689 | D02194 | Negative |
| 696 | D01689 | D02483 | Negative |
| 697 | D01689 | D05209 | Negative |
| 698 | D01689 | D06645 | Negative |
| 699 | D01708 | D07132 | Negative |
| 700 | D01708 | D07992 | Negative |
| 701 | D01708 | D08996 | Negative |
| 702 | D01966 | D05632 | Negative |
| 703 | D01984 | D03820 | Negative |
| 704 | D02076 | D02086 | Negative |
| 705 | D02082 | D03048 | Negative |
| 706 | D02082 | D05209 | Negative |
| 707 | D02095 | D03860 | Negative |
| 708 | D02095 | D05649 | Negative |
| 709 | D02101 | D06645 | Negative |
| 710 | D02149 | D06412 | Negative |
| 711 | D02216 | D02367 | Negative |
| 712 | D02272 | D04104 | Negative |
| 713 | D02272 | D05632 | Negative |
| 714 | D02367 | D02487 | Negative |
| 715 | D02367 | D06645 | Negative |
| 716 | D02367 | D08131 | Negative |
| 717 | D02388 | D03182 | Negative |
| 718 | D02483 | D08127 | Negative |
| 719 | D02487 | D03182 | Negative |
| 720 | D03182 | D03820 | Negative |
| 721 | D03182 | D05277 | Negative |
| 722 | D03182 | D05649 | Negative |
| 723 | D03182 | D08205 | Negative |
| 724 | D05277 | D07992 | Negative |
| 725 | D06236 | D07992 | Negative |
| 726 | D06645 | D08205 | Negative |
