# Supplementary material for: Prediction of Effective Drug Combinations by Chemical Interaction, Protein Interaction and Target Enrichment of KEGG Pathways
Source: Hindawi journal article supplement (doi:10.1155/2013/723780), 2013-01-01
Supplement: f2 [file 723780.f2.pdf]

**Supplementary Material II: Targets of 169 drugs investigated in the study.**

| <b>Drug</b> | <b>Target</b>   |
|-------------|-----------------|
| D00023      | ENSP00000285379 |
| D00023      | ENSP00000344456 |
| D00023      | ENSP00000357066 |
| D00049      | ENSP00000299964 |
| D00049      | ENSP00000375066 |
| D00049      | ENSP00000378782 |
| D00059      | ENSP00000176183 |
| D00059      | ENSP00000306129 |
| D00059      | ENSP00000327652 |
| D00059      | ENSP00000354859 |
| D00059      | ENSP00000373169 |
| D00068      | ENSP00000023897 |
| D00068      | ENSP00000209668 |
| D00068      | ENSP00000218075 |
| D00068      | ENSP00000274576 |
| D00068      | ENSP00000306606 |
| D00068      | ENSP00000355155 |
| D00088      | ENSP00000231509 |
| D00088      | ENSP00000257497 |
| D00088      | ENSP00000327251 |
| D00094      | ENSP00000014914 |
| D00094      | ENSP00000237696 |
| D00094      | ENSP00000249750 |
| D00094      | ENSP00000254066 |
| D00094      | ENSP00000297785 |
| D00094      | ENSP00000352900 |
| D00094      | ENSP00000363812 |
| D00094      | ENSP00000368253 |
| D00095      | ENSP00000280155 |
| D00095      | ENSP00000303500 |
| D00095      | ENSP00000305372 |
| D00095      | ENSP00000306662 |
| D00095      | ENSP00000343782 |
| D00095      | ENSP00000358301 |
| D00095      | ENSP00000368766 |
| D00095      | ENSP00000369960 |
| D00095      | ENSP00000386069 |
| D00095      | ENSP00000387281 |
| D00105      | ENSP00000206249 |
| D00105      | ENSP00000336528 |

|        |                 |
|--------|-----------------|
| D00105 | ENSP00000343925 |
| D00109 | ENSP00000287936 |
| D00109 | ENSP00000354612 |
| D00109 | ENSP00000356438 |
| D00109 | ENSP00000370254 |
| D00113 | ENSP00000255380 |
| D00113 | ENSP00000306490 |
| D00113 | ENSP00000319984 |
| D00113 | ENSP00000409378 |
| D00118 | ENSP00000354612 |
| D00118 | ENSP00000356438 |
| D00126 | ENSP00000354612 |
| D00126 | ENSP00000356438 |
| D00145 | ENSP00000315644 |
| D00145 | ENSP00000319170 |
| D00145 | ENSP00000396308 |
| D00165 | ENSP00000231509 |
| D00165 | ENSP00000257497 |
| D00182 | ENSP00000325120 |
| D00186 | ENSP00000396704 |
| D00186 | ENSP00000411532 |
| D00188 | ENSP00000229022 |
| D00211 | ENSP00000215591 |
| D00211 | ENSP00000228347 |
| D00211 | ENSP00000263331 |
| D00211 | ENSP00000263857 |
| D00211 | ENSP00000312735 |
| D00211 | ENSP00000314949 |
| D00211 | ENSP00000336528 |
| D00211 | ENSP00000361446 |
| D00217 | ENSP00000354612 |
| D00217 | ENSP00000356438 |
| D00222 | ENSP00000216367 |
| D00222 | ENSP00000217800 |
| D00222 | ENSP00000230859 |
| D00222 | ENSP00000231198 |
| D00222 | ENSP00000241436 |
| D00222 | ENSP00000242248 |
| D00222 | ENSP00000251607 |
| D00222 | ENSP00000264233 |
| D00222 | ENSP00000265421 |
| D00222 | ENSP00000268124 |
| D00222 | ENSP00000299206 |

|        |                 |
|--------|-----------------|
| D00222 | ENSP00000322570 |
| D00222 | ENSP00000351697 |
| D00222 | ENSP00000361310 |
| D00222 | ENSP00000363284 |
| D00222 | ENSP00000368349 |
| D00222 | ENSP00000370968 |
| D00222 | ENSP00000420176 |
| D00235 | ENSP00000358301 |
| D00236 | ENSP00000219240 |
| D00246 | ENSP00000231509 |
| D00251 | ENSP00000219070 |
| D00251 | ENSP00000290866 |
| D00251 | ENSP00000361405 |
| D00267 | ENSP00000023897 |
| D00267 | ENSP00000264318 |
| D00267 | ENSP00000265294 |
| D00267 | ENSP00000274545 |
| D00267 | ENSP00000274547 |
| D00267 | ENSP00000295452 |
| D00267 | ENSP00000295454 |
| D00267 | ENSP00000299267 |
| D00267 | ENSP00000331912 |
| D00267 | ENSP00000335592 |
| D00267 | ENSP00000348897 |
| D00267 | ENSP00000359329 |
| D00267 | ENSP00000359334 |
| D00267 | ENSP00000359353 |
| D00267 | ENSP00000367848 |
| D00267 | ENSP00000386029 |
| D00267 | ENSP00000410732 |
| D00267 | ENSP00000412673 |
| D00272 | ENSP00000262502 |
| D00272 | ENSP00000370381 |
| D00282 | ENSP00000003100 |
| D00282 | ENSP00000262888 |
| D00282 | ENSP00000337915 |
| D00292 | ENSP00000231509 |
| D00292 | ENSP00000257497 |
| D00292 | ENSP00000327251 |
| D00292 | ENSP00000368253 |
| D00302 | ENSP00000270474 |
| D00302 | ENSP00000282096 |
| D00302 | ENSP00000341187 |

|        |                 |
|--------|-----------------|
| D00302 | ENSP00000347046 |
| D00302 | ENSP00000351957 |
| D00302 | ENSP00000361850 |
| D00302 | ENSP00000361965 |
| D00335 | ENSP00000261200 |
| D00335 | ENSP00000287820 |
| D00335 | ENSP00000357068 |
| D00335 | ENSP00000374467 |
| D00336 | ENSP00000003084 |
| D00336 | ENSP00000261200 |
| D00336 | ENSP00000263817 |
| D00336 | ENSP00000339960 |
| D00336 | ENSP00000345708 |
| D00336 | ENSP00000363868 |
| D00336 | ENSP00000374467 |
| D00340 | ENSP00000178638 |
| D00340 | ENSP00000256119 |
| D00340 | ENSP00000262502 |
| D00340 | ENSP00000285379 |
| D00340 | ENSP00000286627 |
| D00340 | ENSP00000300900 |
| D00340 | ENSP00000367608 |
| D00346 | ENSP00000340684 |
| D00346 | ENSP00000367309 |
| D00357 | ENSP00000273430 |
| D00358 | ENSP00000275493 |
| D00358 | ENSP00000283254 |
| D00358 | ENSP00000283256 |
| D00358 | ENSP00000328968 |
| D00358 | ENSP00000346534 |
| D00358 | ENSP00000364554 |
| D00358 | ENSP00000386306 |
| D00358 | ENSP00000390600 |
| D00358 | ENSP00000396320 |
| D00359 | ENSP00000287936 |
| D00359 | ENSP00000349252 |
| D00359 | ENSP00000381331 |
| D00362 | ENSP00000252519 |
| D00362 | ENSP00000290866 |
| D00383 | ENSP00000290866 |
| D00386 | ENSP00000228916 |
| D00386 | ENSP00000300061 |
| D00386 | ENSP00000321594 |

|        |                 |
|--------|-----------------|
| D00386 | ENSP00000345751 |
| D00397 | ENSP00000255380 |
| D00397 | ENSP00000306490 |
| D00397 | ENSP00000319984 |
| D00397 | ENSP00000409378 |
| D00400 | ENSP00000273430 |
| D00402 | ENSP00000256119 |
| D00405 | ENSP00000280155 |
| D00405 | ENSP00000350616 |
| D00405 | ENSP00000386069 |
| D00405 | ENSP00000387281 |
| D00419 | ENSP00000245457 |
| D00419 | ENSP00000291294 |
| D00419 | ENSP00000302846 |
| D00419 | ENSP00000349003 |
| D00432 | ENSP00000305372 |
| D00432 | ENSP00000343782 |
| D00432 | ENSP00000358301 |
| D00434 | ENSP00000287936 |
| D00434 | ENSP00000303242 |
| D00443 | ENSP00000350815 |
| D00443 | ENSP00000363822 |
| D00454 | ENSP00000176183 |
| D00454 | ENSP00000255380 |
| D00454 | ENSP00000276198 |
| D00454 | ENSP00000280155 |
| D00454 | ENSP00000289753 |
| D00454 | ENSP00000306129 |
| D00454 | ENSP00000306490 |
| D00454 | ENSP00000306662 |
| D00454 | ENSP00000307766 |
| D00454 | ENSP00000313661 |
| D00454 | ENSP00000316244 |
| D00454 | ENSP00000319984 |
| D00454 | ENSP00000327652 |
| D00454 | ENSP00000337949 |
| D00454 | ENSP00000347754 |
| D00454 | ENSP00000354859 |
| D00454 | ENSP00000358963 |
| D00454 | ENSP00000367959 |
| D00454 | ENSP00000368766 |
| D00454 | ENSP00000369960 |
| D00454 | ENSP00000373169 |

|        |                 |
|--------|-----------------|
| D00454 | ENSP00000386069 |
| D00454 | ENSP00000387281 |
| D00454 | ENSP00000409378 |
| D00455 | ENSP00000262623 |
| D00455 | ENSP00000334216 |
| D00459 | ENSP00000290866 |
| D00469 | ENSP00000264381 |
| D00469 | ENSP00000303211 |
| D00475 | ENSP00000227638 |
| D00475 | ENSP00000301891 |
| D00475 | ENSP00000367102 |
| D00480 | ENSP00000255380 |
| D00480 | ENSP00000272298 |
| D00480 | ENSP00000291295 |
| D00480 | ENSP00000306490 |
| D00480 | ENSP00000319984 |
| D00480 | ENSP00000349467 |
| D00480 | ENSP00000354859 |
| D00480 | ENSP00000367959 |
| D00480 | ENSP00000369960 |
| D00480 | ENSP00000409378 |
| D00482 | ENSP00000234961 |
| D00482 | ENSP00000265572 |
| D00482 | ENSP00000394624 |
| D00483 | ENSP00000305372 |
| D00483 | ENSP00000316244 |
| D00483 | ENSP00000343782 |
| D00483 | ENSP00000358301 |
| D00483 | ENSP00000358963 |
| D00485 | ENSP00000261707 |
| D00485 | ENSP00000270349 |
| D00485 | ENSP00000280155 |
| D00485 | ENSP00000305372 |
| D00485 | ENSP00000306662 |
| D00485 | ENSP00000343782 |
| D00485 | ENSP00000358301 |
| D00485 | ENSP00000368766 |
| D00485 | ENSP00000369237 |
| D00485 | ENSP00000369960 |
| D00485 | ENSP00000386069 |
| D00485 | ENSP00000387281 |
| D00503 | ENSP00000272298 |
| D00503 | ENSP00000291295 |

|        |                 |
|--------|-----------------|
| D00503 | ENSP00000327652 |
| D00503 | ENSP00000349467 |
| D00503 | ENSP00000354859 |
| D00511 | ENSP00000306662 |
| D00511 | ENSP00000368766 |
| D00511 | ENSP00000369960 |
| D00516 | ENSP00000357669 |
| D00523 | ENSP00000273430 |
| D00523 | ENSP00000360266 |
| D00528 | ENSP00000304501 |
| D00528 | ENSP00000308549 |
| D00528 | ENSP00000332116 |
| D00528 | ENSP00000336630 |
| D00528 | ENSP00000352608 |
| D00551 | ENSP00000283254 |
| D00551 | ENSP00000283256 |
| D00551 | ENSP00000328968 |
| D00551 | ENSP00000346534 |
| D00551 | ENSP00000364554 |
| D00551 | ENSP00000386306 |
| D00551 | ENSP00000390600 |
| D00551 | ENSP00000396320 |
| D00553 | ENSP00000283254 |
| D00553 | ENSP00000283256 |
| D00553 | ENSP00000328968 |
| D00553 | ENSP00000364554 |
| D00553 | ENSP00000385019 |
| D00553 | ENSP00000386796 |
| D00553 | ENSP00000390600 |
| D00554 | ENSP00000206249 |
| D00554 | ENSP00000336528 |
| D00554 | ENSP00000343925 |
| D00558 | ENSP00000350616 |
| D00570 | ENSP00000217133 |
| D00570 | ENSP00000259818 |
| D00570 | ENSP00000264071 |
| D00570 | ENSP00000309431 |
| D00570 | ENSP00000318697 |
| D00570 | ENSP00000320295 |
| D00570 | ENSP00000328808 |
| D00570 | ENSP00000341289 |
| D00570 | ENSP00000369703 |
| D00570 | ENSP00000399155 |

|        |                 |
|--------|-----------------|
| D00570 | ENSP00000400663 |
| D00570 | ENSP00000401317 |
| D00570 | ENSP00000410071 |
| D00570 | ENSP00000410829 |
| D00575 | ENSP00000206249 |
| D00593 | ENSP00000261200 |
| D00593 | ENSP00000345708 |
| D00593 | ENSP00000374467 |
| D00594 | ENSP00000261200 |
| D00594 | ENSP00000287820 |
| D00594 | ENSP00000374467 |
| D00596 | ENSP00000287820 |
| D00596 | ENSP00000339787 |
| D00603 | ENSP00000305372 |
| D00603 | ENSP00000343782 |
| D00603 | ENSP00000358301 |
| D00604 | ENSP00000280155 |
| D00604 | ENSP00000386069 |
| D00604 | ENSP00000387281 |
| D00615 | ENSP00000256119 |
| D00615 | ENSP00000266376 |
| D00615 | ENSP00000288139 |
| D00615 | ENSP00000288197 |
| D00615 | ENSP00000320025 |
| D00615 | ENSP00000349320 |
| D00615 | ENSP00000355192 |
| D00615 | ENSP00000365441 |
| D00615 | ENSP00000377840 |
| D00619 | ENSP00000221444 |
| D00619 | ENSP00000261707 |
| D00619 | ENSP00000262186 |
| D00619 | ENSP00000266376 |
| D00619 | ENSP00000288139 |
| D00619 | ENSP00000301050 |
| D00619 | ENSP00000320025 |
| D00619 | ENSP00000328968 |
| D00619 | ENSP00000345708 |
| D00619 | ENSP00000352011 |
| D00619 | ENSP00000353362 |
| D00619 | ENSP00000355192 |
| D00619 | ENSP00000358784 |
| D00619 | ENSP00000358786 |
| D00619 | ENSP00000365441 |



|        |                 |
|--------|-----------------|
| D00619 | ENSP00000376966 |
| D00619 | ENSP00000377840 |
| D00619 | ENSP00000383330 |
| D00619 | ENSP00000385019 |
| D00620 | ENSP00000290866 |
| D00621 | ENSP00000290866 |
| D00623 | ENSP00000252519 |
| D00623 | ENSP00000290866 |
| D00626 | ENSP00000230882 |
| D00626 | ENSP00000269571 |
| D00626 | ENSP00000273430 |
| D00626 | ENSP00000360973 |
| D00627 | ENSP00000273430 |
| D00627 | ENSP00000287820 |
| D00634 | ENSP00000305372 |
| D00634 | ENSP00000358301 |
| D00649 | ENSP00000225823 |
| D00649 | ENSP00000228468 |
| D00649 | ENSP00000228916 |
| D00649 | ENSP00000263980 |
| D00649 | ENSP00000300061 |
| D00649 | ENSP00000321594 |
| D00649 | ENSP00000345751 |
| D00649 | ENSP00000354193 |
| D00649 | ENSP00000361850 |
| D00650 | ENSP00000256119 |
| D00650 | ENSP00000262502 |
| D00650 | ENSP00000285379 |
| D00650 | ENSP00000286627 |
| D00650 | ENSP00000300900 |
| D00650 | ENSP00000370381 |
| D00653 | ENSP00000178638 |
| D00653 | ENSP00000256119 |
| D00653 | ENSP00000285379 |
| D00653 | ENSP00000285381 |
| D00653 | ENSP00000300900 |
| D00653 | ENSP00000309649 |
| D00653 | ENSP00000314099 |
| D00653 | ENSP00000314407 |
| D00653 | ENSP00000318912 |
| D00653 | ENSP00000345659 |
| D00653 | ENSP00000358107 |
| D00653 | ENSP00000366662 |

|        |                 |
|--------|-----------------|
| D00653 | ENSP00000367608 |
| D00665 | ENSP00000261707 |
| D00665 | ENSP00000270349 |
| D00665 | ENSP00000369237 |
| D00676 | ENSP00000313661 |
| D00676 | ENSP00000316244 |
| D00676 | ENSP00000322924 |
| D00676 | ENSP00000358963 |
| D00679 | ENSP00000280155 |
| D00679 | ENSP00000306662 |
| D00679 | ENSP00000313661 |
| D00679 | ENSP00000316244 |
| D00679 | ENSP00000354859 |
| D00679 | ENSP00000358963 |
| D00679 | ENSP00000367959 |
| D00679 | ENSP00000368766 |
| D00679 | ENSP00000369237 |
| D00679 | ENSP00000369960 |
| D00679 | ENSP00000387281 |
| D00683 | ENSP00000305372 |
| D00687 | ENSP00000305372 |
| D00690 | ENSP00000231509 |
| D00729 | ENSP00000234961 |
| D00729 | ENSP00000264708 |
| D00729 | ENSP00000265572 |
| D00729 | ENSP00000272298 |
| D00729 | ENSP00000291295 |
| D00729 | ENSP00000349467 |
| D00729 | ENSP00000353362 |
| D00729 | ENSP00000394624 |
| D00738 | ENSP00000283254 |
| D00738 | ENSP00000283256 |
| D00738 | ENSP00000328968 |
| D00738 | ENSP00000346534 |
| D00738 | ENSP00000364554 |
| D00738 | ENSP00000386306 |
| D00738 | ENSP00000390600 |
| D00738 | ENSP00000396320 |
| D00743 | ENSP00000306662 |
| D00743 | ENSP00000368766 |
| D00743 | ENSP00000369960 |
| D00809 | ENSP00000228858 |
| D00809 | ENSP00000234961 |

|        |                 |
|--------|-----------------|
| D00809 | ENSP00000255380 |
| D00809 | ENSP00000261707 |
| D00809 | ENSP00000265572 |
| D00809 | ENSP00000277120 |
| D00809 | ENSP00000280155 |
| D00809 | ENSP00000306490 |
| D00809 | ENSP00000316244 |
| D00809 | ENSP00000319591 |
| D00809 | ENSP00000319984 |
| D00809 | ENSP00000333496 |
| D00809 | ENSP00000352035 |
| D00809 | ENSP00000367959 |
| D00809 | ENSP00000368766 |
| D00809 | ENSP00000369237 |
| D00809 | ENSP00000369960 |
| D00809 | ENSP00000409378 |
| D00823 | ENSP00000261707 |
| D00823 | ENSP00000367959 |
| D00842 | ENSP00000234961 |
| D00842 | ENSP00000265572 |
| D00842 | ENSP00000394624 |
| D00847 | ENSP00000234961 |
| D00847 | ENSP00000265572 |
| D00847 | ENSP00000394624 |
| D00848 | ENSP00000261707 |
| D00848 | ENSP00000277010 |
| D00848 | ENSP00000279593 |
| D00848 | ENSP00000332549 |
| D00848 | ENSP00000355155 |
| D00848 | ENSP00000360616 |
| D00887 | ENSP00000242057 |
| D00887 | ENSP00000287936 |
| D00887 | ENSP00000353731 |
| D00904 | ENSP00000228468 |
| D00904 | ENSP00000352035 |
| D00904 | ENSP00000354612 |
| D00904 | ENSP00000356438 |
| D00904 | ENSP00000363512 |
| D00904 | ENSP00000364252 |
| D00904 | ENSP00000373648 |
| D00904 | ENSP00000396320 |
| D00939 | ENSP00000254667 |
| D00939 | ENSP00000263708 |

|        |                 |
|--------|-----------------|
| D00939 | ENSP00000273398 |
| D00939 | ENSP00000349078 |
| D00939 | ENSP00000349932 |
| D00944 | ENSP00000229328 |
| D00944 | ENSP00000346148 |
| D00944 | ENSP00000360290 |
| D00945 | ENSP00000287820 |
| D00950 | ENSP00000206249 |
| D00950 | ENSP00000274192 |
| D00950 | ENSP00000325120 |
| D00950 | ENSP00000363822 |
| D00953 | ENSP00000325120 |
| D00970 | ENSP00000354612 |
| D00970 | ENSP00000356438 |
| D00972 | ENSP00000231509 |
| D00980 | ENSP00000231509 |
| D00981 | ENSP00000231509 |
| D00983 | ENSP00000231509 |
| D00994 | ENSP00000264381 |
| D00994 | ENSP00000303211 |
| D01002 | ENSP00000255380 |
| D01002 | ENSP00000306490 |
| D01002 | ENSP00000319984 |
| D01002 | ENSP00000409378 |
| D01024 | ENSP00000306662 |
| D01024 | ENSP00000368766 |
| D01024 | ENSP00000369960 |
| D01066 | ENSP00000234179 |
| D01066 | ENSP00000263125 |
| D01066 | ENSP00000263431 |
| D01066 | ENSP00000291281 |
| D01066 | ENSP00000291906 |
| D01066 | ENSP00000295797 |
| D01066 | ENSP00000305355 |
| D01066 | ENSP00000306124 |
| D01066 | ENSP00000329127 |
| D01066 | ENSP00000331602 |
| D01066 | ENSP00000333568 |
| D01066 | ENSP00000343325 |
| D01066 | ENSP00000359552 |
| D01066 | ENSP00000367830 |
| D01112 | ENSP00000254066 |
| D01112 | ENSP00000332296 |

|        |                 |
|--------|-----------------|
| D01112 | ENSP00000352900 |
| D01112 | ENSP00000363812 |
| D01112 | ENSP00000419692 |
| D01203 | ENSP00000319591 |
| D01203 | ENSP00000334198 |
| D01204 | ENSP00000273430 |
| D01294 | ENSP00000206249 |
| D01294 | ENSP00000325120 |
| D01302 | ENSP00000263556 |
| D01302 | ENSP00000312326 |
| D01340 | ENSP00000206249 |
| D01340 | ENSP00000234961 |
| D01340 | ENSP00000265572 |
| D01340 | ENSP00000387699 |
| D01340 | ENSP00000394624 |
| D01355 | ENSP00000234961 |
| D01355 | ENSP00000255380 |
| D01355 | ENSP00000261707 |
| D01355 | ENSP00000265572 |
| D01355 | ENSP00000276198 |
| D01355 | ENSP00000299847 |
| D01355 | ENSP00000303727 |
| D01355 | ENSP00000355155 |
| D01355 | ENSP00000369237 |
| D01355 | ENSP00000394624 |
| D01373 | ENSP00000305372 |
| D01402 | ENSP00000231509 |
| D01413 | ENSP00000206249 |
| D01413 | ENSP00000336528 |
| D01413 | ENSP00000343925 |
| D01450 | ENSP00000283254 |
| D01450 | ENSP00000283256 |
| D01450 | ENSP00000292513 |
| D01450 | ENSP00000328968 |
| D01450 | ENSP00000346534 |
| D01450 | ENSP00000364554 |
| D01450 | ENSP00000386306 |
| D01450 | ENSP00000390600 |
| D01450 | ENSP00000396320 |
| D01453 | ENSP00000304501 |
| D01453 | ENSP00000308549 |
| D01453 | ENSP00000332116 |
| D01453 | ENSP00000336630 |

|        |                 |
|--------|-----------------|
| D01453 | ENSP00000352608 |
| D01637 | ENSP00000231509 |
| D01689 | ENSP00000231509 |
| D01708 | ENSP00000231509 |
| D01708 | ENSP00000325120 |
| D01708 | ENSP00000350815 |
| D01708 | ENSP00000356436 |
| D01966 | ENSP00000289547 |
| D01966 | ENSP00000300060 |
| D01966 | ENSP00000356591 |
| D01984 | ENSP00000262623 |
| D01984 | ENSP00000334216 |
| D02060 | ENSP00000262461 |
| D02060 | ENSP00000264930 |
| D02060 | ENSP00000318557 |
| D02060 | ENSP00000346112 |
| D02060 | ENSP00000370381 |
| D02060 | ENSP00000387694 |
| D02069 | ENSP00000255380 |
| D02069 | ENSP00000306490 |
| D02069 | ENSP00000319984 |
| D02069 | ENSP00000409378 |
| D02076 | ENSP00000280155 |
| D02076 | ENSP00000386069 |
| D02076 | ENSP00000387281 |
| D02082 | ENSP00000273430 |
| D02086 | ENSP00000275493 |
| D02086 | ENSP00000283254 |
| D02086 | ENSP00000283256 |
| D02086 | ENSP00000328968 |
| D02086 | ENSP00000346534 |
| D02086 | ENSP00000364554 |
| D02086 | ENSP00000386306 |
| D02086 | ENSP00000390600 |
| D02086 | ENSP00000396320 |
| D02095 | ENSP00000234961 |
| D02095 | ENSP00000265572 |
| D02095 | ENSP00000277010 |
| D02095 | ENSP00000394624 |
| D02101 | ENSP00000234961 |
| D02101 | ENSP00000265572 |
| D02101 | ENSP00000394624 |
| D02149 | ENSP00000280155 |

|        |                 |
|--------|-----------------|
| D02149 | ENSP00000303500 |
| D02149 | ENSP00000305372 |
| D02149 | ENSP00000306662 |
| D02149 | ENSP00000343782 |
| D02149 | ENSP00000358301 |
| D02149 | ENSP00000368766 |
| D02149 | ENSP00000369960 |
| D02149 | ENSP00000386069 |
| D02149 | ENSP00000387281 |
| D02194 | ENSP00000261615 |
| D02212 | ENSP00000255380 |
| D02212 | ENSP00000306490 |
| D02212 | ENSP00000319984 |
| D02212 | ENSP00000409378 |
| D02216 | ENSP00000396704 |
| D02216 | ENSP00000411532 |
| D02227 | ENSP00000265572 |
| D02227 | ENSP00000277010 |
| D02227 | ENSP00000394624 |
| D02272 | ENSP00000262186 |
| D02272 | ENSP00000263372 |
| D02272 | ENSP00000283254 |
| D02272 | ENSP00000283256 |
| D02272 | ENSP00000328968 |
| D02272 | ENSP00000346534 |
| D02272 | ENSP00000355580 |
| D02272 | ENSP00000364554 |
| D02272 | ENSP00000386306 |
| D02272 | ENSP00000396320 |
| D02367 | ENSP00000206249 |
| D02367 | ENSP00000325120 |
| D02388 | ENSP00000280155 |
| D02388 | ENSP00000386069 |
| D02388 | ENSP00000387281 |
| D02483 | ENSP00000261173 |
| D02483 | ENSP00000262429 |
| D02483 | ENSP00000263519 |
| D02483 | ENSP00000324172 |
| D02483 | ENSP00000324892 |
| D02483 | ENSP00000349595 |
| D02483 | ENSP00000350310 |
| D02483 | ENSP00000352665 |
| D02483 | ENSP00000353072 |

|        |                 |
|--------|-----------------|
| D02487 | ENSP00000281243 |
| D02487 | ENSP00000319170 |
| D02487 | ENSP00000396308 |
| D03048 | ENSP00000265986 |
| D03048 | ENSP00000323929 |
| D03182 | ENSP00000023897 |
| D03182 | ENSP00000264318 |
| D03182 | ENSP00000264426 |
| D03182 | ENSP00000274545 |
| D03182 | ENSP00000303727 |
| D03182 | ENSP00000335592 |
| D03182 | ENSP00000348897 |
| D03182 | ENSP00000359285 |
| D03182 | ENSP00000359334 |
| D03182 | ENSP00000397026 |
| D03799 | ENSP00000325120 |
| D03820 | ENSP00000274192 |
| D03860 | ENSP00000234961 |
| D03860 | ENSP00000394624 |
| D03917 | ENSP00000325120 |
| D03917 | ENSP00000350815 |
| D03917 | ENSP00000363822 |
| D04104 | ENSP00000206249 |
| D04104 | ENSP00000325120 |
| D05205 | ENSP00000206249 |
| D05205 | ENSP00000325120 |
| D05209 | ENSP00000206249 |
| D05209 | ENSP00000325120 |
| D05277 | ENSP00000305372 |
| D05632 | ENSP00000394624 |
| D05649 | ENSP00000261707 |
| D05649 | ENSP00000270349 |
| D05649 | ENSP00000280155 |
| D05649 | ENSP00000305372 |
| D05649 | ENSP00000306662 |
| D05649 | ENSP00000343782 |
| D05649 | ENSP00000358301 |
| D05649 | ENSP00000368766 |
| D05649 | ENSP00000369237 |
| D05649 | ENSP00000369960 |
| D05649 | ENSP00000386069 |
| D05649 | ENSP00000387281 |
| D06236 | ENSP00000315644 |



|        |                 |
|--------|-----------------|
| D06236 | ENSP00000319170 |
| D06236 | ENSP00000396308 |
| D06412 | ENSP00000272190 |
| D06645 | ENSP00000353731 |
| D07132 | ENSP00000234961 |
| D07132 | ENSP00000265572 |
| D07132 | ENSP00000394624 |
| D07992 | ENSP00000290866 |
| D08127 | ENSP00000275493 |
| D08127 | ENSP00000283254 |
| D08127 | ENSP00000283256 |
| D08127 | ENSP00000328968 |
| D08127 | ENSP00000346534 |
| D08127 | ENSP00000364554 |
| D08127 | ENSP00000386306 |
| D08127 | ENSP00000390600 |
| D08127 | ENSP00000396320 |
| D08131 | ENSP00000252519 |
| D08131 | ENSP00000290866 |
| D08205 | ENSP00000280155 |
| D08205 | ENSP00000350616 |
| D08205 | ENSP00000386069 |
| D08205 | ENSP00000387281 |
| D08249 | ENSP00000206249 |
| D08249 | ENSP00000234961 |
| D08249 | ENSP00000265572 |
| D08249 | ENSP00000387699 |
| D08249 | ENSP00000394624 |
| D08996 | ENSP00000353731 |
