# Supplementary material for: Prediction of Effective Drug Combinations by Chemical Interaction, Protein Interaction and Target Enrichment of KEGG Pathways
Source: Hindawi journal article supplement (doi:10.1155/2013/723780), 2013-01-01
Supplement: f3 [file 723780.f3.pdf]

### Supplementary Material III: Two lists obtained by mRMR

**Note:** the one-to-one correspondence of pathway ID and pathway name can be found in the third table in this file.

#### (I) MaxRel features list

| Order | Feature name                            |
|-------|-----------------------------------------|
| 1     | F1 <sup>a</sup>                         |
| 2     | hsa04964_1+hsa04964_2 <sup>h</sup>      |
| 3     | F2 <sup>b</sup>                         |
| 4     | hsa00052_1+hsa00052_2                   |
| 5     | hsa04970_1+hsa04970_2                   |
| 6     | abs(hsa00910_1-hsa00910_2) <sup>i</sup> |
| 7     | hsa00910_1+hsa00910_2                   |
| 8     | abs(hsa05215_1-hsa05215_2)              |
| 9     | abs(hsa05130_1-hsa05130_2)              |
| 10    | abs(hsa00520_1-hsa00520_2)              |
| 11    | hsa05211_1+hsa05211_2                   |
| 12    | hsa04960_1+hsa04960_2                   |
| 13    | hsa05130_1+hsa05130_2                   |
| 14    | abs(hsa04973_1-hsa04973_2)              |
| 15    | hsa04972_1+hsa04972_2                   |
| 16    | hsa00520_1+hsa00520_2                   |
| 17    | hsa05110_1+hsa05110_2                   |
| 18    | abs(hsa04964_1-hsa04964_2)              |
| 19    | abs(hsa04115_1-hsa04115_2)              |
| 20    | F3 <sup>c</sup>                         |
| 21    | abs(hsa04340_1-hsa04340_2)              |
| 22    | hsa05100_1+hsa05100_2                   |
| 23    | hsa05214_1+hsa05214_2                   |
| 24    | abs(hsa04320_1-hsa04320_2)              |
| 25    | hsa05020_1+hsa05020_2                   |
| 26    | hsa04330_1+hsa04330_2                   |
| 27    | abs(hsa05110_1-hsa05110_2)              |
| 28    | abs(hsa04970_1-hsa04970_2)              |
| 29    | hsa04145_1+hsa04145_2                   |
| 30    | hsa04150_1+hsa04150_2                   |
| 31    | hsa04622_1+hsa04622_2                   |
| 32    | hsa04620_1+hsa04620_2                   |
| 33    | abs(hsa05222_1-hsa05222_2)              |
| 34    | abs(hsa05220_1-hsa05220_2)              |
| 35    | hsa04910_1+hsa04910_2                   |
| 36    | hsa04930_1+hsa04930_2                   |

|    |                            |
|----|----------------------------|
| 37 | abs(hsa04330_1-hsa04330_2) |
| 38 | abs(hsa05150_1-hsa05150_2) |
| 39 | hsa04210_1+hsa04210_2      |
| 40 | hsa04973_1+hsa04973_2      |
| 41 | hsa05218_1+hsa05218_2      |
| 42 | hsa05213_1+hsa05213_2      |
| 43 | hsa04621_1+hsa04621_2      |
| 44 | hsa05222_1+hsa05222_2      |
| 45 | abs(hsa05217_1-hsa05217_2) |
| 46 | hsa05143_1+hsa05143_2      |
| 47 | abs(hsa04720_1-hsa04720_2) |
| 48 | hsa05215_1+hsa05215_2      |
| 49 | hsa04115_1+hsa04115_2      |
| 50 | hsa04380_1+hsa04380_2      |
| 51 | hsa04722_1+hsa04722_2      |
| 52 | abs(hsa00140_1-hsa00140_2) |
| 53 | hsa05010_1+hsa05010_2      |
| 54 | abs(hsa05131_1-hsa05131_2) |
| 55 | hsa04310_1+hsa04310_2      |
| 56 | abs(hsa00830_1-hsa00830_2) |
| 57 | hsa05142_1+hsa05142_2      |
| 58 | hsa05221_1+hsa05221_2      |
| 59 | abs(hsa05218_1-hsa05218_2) |
| 60 | hsa00430_1+hsa00430_2      |
| 61 | abs(hsa04662_1-hsa04662_2) |
| 62 | abs(hsa00604_1-hsa00604_2) |
| 63 | hsa05120_1+hsa05120_2      |
| 64 | hsa04662_1+hsa04662_2      |
| 65 | abs(hsa04120_1-hsa04120_2) |
| 66 | abs(hsa00052_1-hsa00052_2) |
| 67 | abs(hsa04370_1-hsa04370_2) |
| 68 | hsa04666_1+hsa04666_2      |
| 69 | abs(hsa04360_1-hsa04360_2) |
| 70 | hsa05160_1+hsa05160_2      |
| 71 | hsa04114_1+hsa04114_2      |
| 72 | abs(hsa04070_1-hsa04070_2) |
| 73 | hsa05216_1+hsa05216_2      |
| 74 | abs(hsa04310_1-hsa04310_2) |
| 75 | abs(hsa00430_1-hsa00430_2) |
| 76 | hsa00480_1+hsa00480_2      |
| 77 | hsa04660_1+hsa04660_2      |
| 78 | abs(hsa05146_1-hsa05146_2) |
| 79 | hsa05145_1+hsa05145_2      |

|     |                            |
|-----|----------------------------|
| 80  | abs(hsa04540_1-hsa04540_2) |
| 81  | abs(hsa04010_1-hsa04010_2) |
| 82  | abs(hsa04960_1-hsa04960_2) |
| 83  | hsa05416_1+hsa05416_2      |
| 84  | abs(hsa05140_1-hsa05140_2) |
| 85  | abs(hsa03450_1-hsa03450_2) |
| 86  | hsa04720_1+hsa04720_2      |
| 87  | abs(hsa00480_1-hsa00480_2) |
| 88  | abs(hsa04650_1-hsa04650_2) |
| 89  | hsa05014_1+hsa05014_2      |
| 90  | abs(hsa04660_1-hsa04660_2) |
| 91  | hsa04971_1+hsa04971_2      |
| 92  | hsa04530_1+hsa04530_2      |
| 93  | abs(hsa05020_1-hsa05020_2) |
| 94  | hsa00130_1+hsa00130_2      |
| 95  | hsa05212_1+hsa05212_2      |
| 96  | abs(hsa04145_1-hsa04145_2) |
| 97  | hsa04920_1+hsa04920_2      |
| 98  | abs(hsa04664_1-hsa04664_2) |
| 99  | hsa00920_1+hsa00920_2      |
| 100 | hsa04010_1+hsa04010_2      |
| 101 | abs(hsa05010_1-hsa05010_2) |
| 102 | hsa00982_1+hsa00982_2      |
| 103 | abs(hsa04614_1-hsa04614_2) |
| 104 | hsa04350_1+hsa04350_2      |
| 105 | abs(hsa04621_1-hsa04621_2) |
| 106 | abs(hsa00232_1-hsa00232_2) |
| 107 | abs(hsa00564_1-hsa00564_2) |
| 108 | abs(hsa05143_1-hsa05143_2) |
| 109 | abs(hsa04623_1-hsa04623_2) |
| 110 | abs(hsa05214_1-hsa05214_2) |
| 111 | abs(hsa00591_1-hsa00591_2) |
| 112 | abs(hsa04912_1-hsa04912_2) |
| 113 | abs(hsa04914_1-hsa04914_2) |
| 114 | hsa00511_1+hsa00511_2      |
| 115 | abs(hsa03410_1-hsa03410_2) |
| 116 | hsa04520_1+hsa04520_2      |
| 117 | abs(hsa04976_1-hsa04976_2) |
| 118 | abs(hsa03420_1-hsa03420_2) |
| 119 | abs(hsa04975_1-hsa04975_2) |
| 120 | hsa04012_1+hsa04012_2      |
| 121 | abs(hsa04620_1-hsa04620_2) |
| 122 | abs(hsa05200_1-hsa05200_2) |

|     |                            |
|-----|----------------------------|
| 123 | abs(hsa00590_1-hsa00590_2) |
| 124 | hsa05131_1+hsa05131_2      |
| 125 | abs(hsa00592_1-hsa00592_2) |
| 126 | abs(hsa00270_1-hsa00270_2) |
| 127 | hsa05200_1+hsa05200_2      |
| 128 | abs(hsa00785_1-hsa00785_2) |
| 129 | hsa05016_1+hsa05016_2      |
| 130 | abs(hsa04972_1-hsa04972_2) |
| 131 | abs(hsa04977_1-hsa04977_2) |
| 132 | abs(hsa05145_1-hsa05145_2) |
| 133 | hsa04120_1+hsa04120_2      |
| 134 | abs(hsa04110_1-hsa04110_2) |
| 135 | hsa00531_1+hsa00531_2      |
| 136 | hsa04623_1+hsa04623_2      |
| 137 | hsa00030_1+hsa00030_2      |
| 138 | abs(hsa00562_1-hsa00562_2) |
| 139 | hsa05220_1+hsa05220_2      |
| 140 | abs(hsa00240_1-hsa00240_2) |
| 141 | hsa05217_1+hsa05217_2      |
| 142 | abs(hsa00565_1-hsa00565_2) |
| 143 | abs(hsa03030_1-hsa03030_2) |
| 144 | abs(hsa04012_1-hsa04012_2) |
| 145 | hsa00020_1+hsa00020_2      |
| 146 | abs(hsa00472_1-hsa00472_2) |
| 147 | abs(hsa03018_1-hsa03018_2) |
| 148 | abs(hsa01100_1-hsa01100_2) |
| 149 | abs(hsa00030_1-hsa00030_2) |
| 150 | hsa01100_1+hsa01100_2      |
| 151 | hsa00562_1+hsa00562_2      |
| 152 | hsa04370_1+hsa04370_2      |
| 153 | abs(hsa05221_1-hsa05221_2) |
| 154 | hsa00564_1+hsa00564_2      |
| 155 | hsa04975_1+hsa04975_2      |
| 156 | abs(hsa03430_1-hsa03430_2) |
| 157 | abs(hsa04930_1-hsa04930_2) |
| 158 | hsa03410_1+hsa03410_2      |
| 159 | hsa00565_1+hsa00565_2      |
| 160 | hsa00590_1+hsa00590_2      |
| 161 | abs(hsa05016_1-hsa05016_2) |
| 162 | abs(hsa00630_1-hsa00630_2) |
| 163 | hsa04940_1+hsa04940_2      |
| 164 | abs(hsa05212_1-hsa05212_2) |
| 165 | abs(hsa00524_1-hsa00524_2) |

|     |                            |
|-----|----------------------------|
| 166 | hsa00532_1+hsa00532_2      |
| 167 | abs(hsa00982_1-hsa00982_2) |
| 168 | hsa04110_1+hsa04110_2      |
| 169 | abs(hsa05223_1-hsa05223_2) |
| 170 | hsa00592_1+hsa00592_2      |
| 171 | hsa00120_1+hsa00120_2      |
| 172 | hsa00380_1+hsa00380_2      |
| 173 | hsa00010_1+hsa00010_2      |
| 174 | hsa00591_1+hsa00591_2      |
| 175 | hsa05223_1+hsa05223_2      |
| 176 | hsa00785_1+hsa00785_2      |
| 177 | hsa05210_1+hsa05210_2      |
| 178 | hsa04540_1+hsa04540_2      |
| 179 | hsa00061_1+hsa00061_2      |
| 180 | abs(hsa00310_1-hsa00310_2) |
| 181 | abs(hsa04380_1-hsa04380_2) |
| 182 | abs(hsa00450_1-hsa00450_2) |
| 183 | abs(hsa00531_1-hsa00531_2) |
| 184 | abs(hsa00290_1-hsa00290_2) |
| 185 | hsa03430_1+hsa03430_2      |
| 186 | abs(hsa04150_1-hsa04150_2) |
| 187 | hsa00604_1+hsa00604_2      |
| 188 | abs(hsa04910_1-hsa04910_2) |
| 189 | hsa00360_1+hsa00360_2      |
| 190 | abs(hsa03440_1-hsa03440_2) |
| 191 | hsa04977_1+hsa04977_2      |
| 192 | hsa05146_1+hsa05146_2      |
| 193 | abs(hsa04744_1-hsa04744_2) |
| 194 | abs(hsa03013_1-hsa03013_2) |
| 195 | abs(hsa05012_1-hsa05012_2) |
| 196 | abs(hsa03040_1-hsa03040_2) |
| 197 | hsa03030_1+hsa03030_2      |
| 198 | hsa00260_1+hsa00260_2      |
| 199 | hsa04730_1+hsa04730_2      |
| 200 | hsa00232_1+hsa00232_2      |
| 201 | hsa04510_1+hsa04510_2      |
| 202 | abs(hsa00380_1-hsa00380_2) |
| 203 | abs(hsa00514_1-hsa00514_2) |
| 204 | hsa05219_1+hsa05219_2      |
| 205 | hsa00350_1+hsa00350_2      |
| 206 | hsa00740_1+hsa00740_2      |
| 207 | abs(hsa05219_1-hsa05219_2) |
| 208 | abs(hsa04940_1-hsa04940_2) |

|     |                            |
|-----|----------------------------|
| 209 | abs(hsa04971_1-hsa04971_2) |
| 210 | hsa00471_1+hsa00471_2      |
| 211 | hsa00230_1+hsa00230_2      |
| 212 | abs(hsa00230_1-hsa00230_2) |
| 213 | abs(hsa04670_1-hsa04670_2) |
| 214 | abs(hsa04666_1-hsa04666_2) |
| 215 | abs(hsa03050_1-hsa03050_2) |
| 216 | abs()                      |
| 217 | hsa00563_1+hsa00563_2      |
| 218 | abs(hsa00510_1-hsa00510_2) |
| 219 | hsa04664_1+hsa04664_2      |
| 220 | hsa00330_1+hsa00330_2      |
| 221 | abs(hsa04080_1-hsa04080_2) |
| 222 | abs(hsa00280_1-hsa00280_2) |
| 223 | hsa00270_1+hsa00270_2      |
| 224 | F7 <sup>g</sup>            |
| 225 | hsa04742_1+hsa04742_2      |
| 226 | hsa03440_1+hsa03440_2      |
| 227 | hsa04650_1+hsa04650_2      |
| 228 | abs(hsa00790_1-hsa00790_2) |
| 229 | abs(hsa05100_1-hsa05100_2) |
| 230 | hsa05320_1+hsa05320_2      |
| 231 | hsa03015_1+hsa03015_2      |
| 232 | abs(hsa04520_1-hsa04520_2) |
| 233 | abs(hsa05211_1-hsa05211_2) |
| 234 | hsa00340_1+hsa00340_2      |
| 235 | abs(hsa00340_1-hsa00340_2) |
| 236 | hsa04142_1+hsa04142_2      |
| 237 | abs(hsa00770_1-hsa00770_2) |
| 238 | abs(hsa05144_1-hsa05144_2) |
| 239 | hsa05012_1+hsa05012_2      |
| 240 | F5 <sup>c</sup>            |
| 241 | hsa04130_1+hsa04130_2      |
| 242 | hsa04672_1+hsa04672_2      |
| 243 | abs(hsa04710_1-hsa04710_2) |
| 244 | abs(hsa00460_1-hsa00460_2) |
| 245 | abs(hsa00471_1-hsa00471_2) |
| 246 | abs(hsa00010_1-hsa00010_2) |
| 247 | abs(hsa04966_1-hsa04966_2) |
| 248 | abs(hsa03022_1-hsa03022_2) |
| 249 | abs(hsa04722_1-hsa04722_2) |
| 250 | hsa00290_1+hsa00290_2      |
| 251 | hsa00053_1+hsa00053_2      |

|     |                            |
|-----|----------------------------|
| 252 | abs(hsa04020_1-hsa04020_2) |
| 253 | hsa05414_1+hsa05414_2      |
| 254 | abs(hsa00730_1-hsa00730_2) |
| 255 | hsa00730_1+hsa00730_2      |
| 256 | abs(hsa04672_1-hsa04672_2) |
| 257 | abs(hsa00260_1-hsa00260_2) |
| 258 | abs(hsa00360_1-hsa00360_2) |
| 259 | abs(hsa00563_1-hsa00563_2) |
| 260 | abs(hsa00600_1-hsa00600_2) |
| 261 | abs(hsa05014_1-hsa05014_2) |
| 262 | abs(hsa00120_1-hsa00120_2) |
| 263 | abs(hsa04530_1-hsa04530_2) |
| 264 | hsa03013_1+hsa03013_2      |
| 265 | hsa03040_1+hsa03040_2      |
| 266 | hsa05310_1+hsa05310_2      |
| 267 | hsa00240_1+hsa00240_2      |
| 268 | abs(hsa05160_1-hsa05160_2) |
| 269 | abs(hsa04920_1-hsa04920_2) |
| 270 | abs(hsa00500_1-hsa00500_2) |
| 271 | abs(hsa05120_1-hsa05120_2) |
| 272 | hsa04070_1+hsa04070_2      |
| 273 | hsa00860_1+hsa00860_2      |
| 274 | abs(hsa05213_1-hsa05213_2) |
| 275 | hsa00603_1+hsa00603_2      |
| 276 | abs(hsa00410_1-hsa00410_2) |
| 277 | hsa03020_1+hsa03020_2      |
| 278 | abs(hsa03020_1-hsa03020_2) |
| 279 | abs(hsa00740_1-hsa00740_2) |
| 280 | hsa00450_1+hsa00450_2      |
| 281 | abs(hsa04114_1-hsa04114_2) |
| 282 | hsa00460_1+hsa00460_2      |
| 283 | hsa04966_1+hsa04966_2      |
| 284 | hsa03008_1+hsa03008_2      |
| 285 | abs(hsa03008_1-hsa03008_2) |
| 286 | hsa05150_1+hsa05150_2      |
| 287 | abs(hsa04612_1-hsa04612_2) |
| 288 | abs(hsa05416_1-hsa05416_2) |
| 289 | hsa00760_1+hsa00760_2      |
| 290 | abs(hsa05210_1-hsa05210_2) |
| 291 | abs(hsa00300_1-hsa00300_2) |
| 292 | hsa00190_1+hsa00190_2      |
| 293 | abs(hsa00190_1-hsa00190_2) |
| 294 | abs(hsa03015_1-hsa03015_2) |

|     |                            |
|-----|----------------------------|
| 295 | abs(hsa04060_1-hsa04060_2) |
| 296 | hsa04976_1+hsa04976_2      |
| 297 | hsa03050_1+hsa03050_2      |
| 298 | hsa04916_1+hsa04916_2      |
| 299 | hsa05144_1+hsa05144_2      |
| 300 | hsa05140_1+hsa05140_2      |
| 301 | abs(hsa04640_1-hsa04640_2) |
| 302 | abs(hsa00760_1-hsa00760_2) |
| 303 | hsa00514_1+hsa00514_2      |
| 304 | hsa00040_1+hsa00040_2      |
| 305 | hsa00983_1+hsa00983_2      |
| 306 | abs(hsa05330_1-hsa05330_2) |
| 307 | hsa04360_1+hsa04360_2      |
| 308 | hsa00510_1+hsa00510_2      |
| 309 | abs(hsa05323_1-hsa05323_2) |
| 310 | hsa00670_1+hsa00670_2      |
| 311 | abs(hsa00670_1-hsa00670_2) |
| 312 | hsa00780_1+hsa00780_2      |
| 313 | abs(hsa00780_1-hsa00780_2) |
| 314 | abs(hsa04130_1-hsa04130_2) |
| 315 | abs(hsa00400_1-hsa00400_2) |
| 316 | abs(hsa00603_1-hsa00603_2) |
| 317 | hsa05330_1+hsa05330_2      |
| 318 | hsa00980_1+hsa00980_2      |
| 319 | hsa04914_1+hsa04914_2      |
| 320 | hsa00300_1+hsa00300_2      |
| 321 | abs(hsa00601_1-hsa00601_2) |
| 322 | hsa04122_1+hsa04122_2      |
| 323 | abs(hsa04122_1-hsa04122_2) |
| 324 | hsa00400_1+hsa00400_2      |
| 325 | hsa04640_1+hsa04640_2      |
| 326 | hsa04144_1+hsa04144_2      |
| 327 | hsa00410_1+hsa00410_2      |
| 328 | abs(hsa04950_1-hsa04950_2) |
| 329 | abs(hsa04062_1-hsa04062_2) |
| 330 | hsa04062_1+hsa04062_2      |
| 331 | abs(hsa00532_1-hsa00532_2) |
| 332 | hsa04020_1+hsa04020_2      |
| 333 | abs(hsa04730_1-hsa04730_2) |
| 334 | abs(hsa00620_1-hsa00620_2) |
| 335 | hsa00140_1+hsa00140_2      |
| 336 | hsa04912_1+hsa04912_2      |
| 337 | hsa00790_1+hsa00790_2      |



|     |                            |
|-----|----------------------------|
| 338 | abs(hsa00130_1-hsa00130_2) |
| 339 | abs(hsa04974_1-hsa04974_2) |
| 340 | abs(hsa04810_1-hsa04810_2) |
| 341 | abs(hsa04140_1-hsa04140_2) |
| 342 | hsa00472_1+hsa00472_2      |
| 343 | abs(hsa04962_1-hsa04962_2) |
| 344 | abs(hsa04514_1-hsa04514_2) |
| 345 | abs(hsa04350_1-hsa04350_2) |
| 346 | hsa00601_1+hsa00601_2      |
| 347 | hsa04270_1+hsa04270_2      |
| 348 | hsa04610_1+hsa04610_2      |
| 349 | hsa04060_1+hsa04060_2      |
| 350 | hsa04514_1+hsa04514_2      |
| 351 | abs(hsa00350_1-hsa00350_2) |
| 352 | hsa04670_1+hsa04670_2      |
| 353 | hsa04962_1+hsa04962_2      |
| 354 | abs(hsa00980_1-hsa00980_2) |
| 355 | abs(hsa04916_1-hsa04916_2) |
| 356 | hsa00970_1+hsa00970_2      |
| 357 | abs(hsa04270_1-hsa04270_2) |
| 358 | abs(hsa05216_1-hsa05216_2) |
| 359 | abs(hsa00020_1-hsa00020_2) |
| 360 | hsa04320_1+hsa04320_2      |
| 361 | hsa04810_1+hsa04810_2      |
| 362 | hsa00524_1+hsa00524_2      |
| 363 | hsa05332_1+hsa05332_2      |
| 364 | abs(hsa05414_1-hsa05414_2) |
| 365 | hsa04950_1+hsa04950_2      |
| 366 | abs(hsa04622_1-hsa04622_2) |
| 367 | hsa04512_1+hsa04512_2      |
| 368 | abs(hsa00053_1-hsa00053_2) |
| 369 | abs(hsa04141_1-hsa04141_2) |
| 370 | abs(hsa00061_1-hsa00061_2) |
| 371 | abs(hsa00970_1-hsa00970_2) |
| 372 | abs(hsa04142_1-hsa04142_2) |
| 373 | hsa05323_1+hsa05323_2      |
| 374 | hsa00600_1+hsa00600_2      |
| 375 | hsa00650_1+hsa00650_2      |
| 376 | abs(hsa04144_1-hsa04144_2) |
| 377 | hsa03060_1+hsa03060_2      |
| 378 | abs(hsa04210_1-hsa04210_2) |
| 379 | abs(hsa00040_1-hsa00040_2) |
| 380 | abs(hsa00250_1-hsa00250_2) |

|     |                            |
|-----|----------------------------|
| 381 | hsa04630_1+hsa04630_2      |
| 382 | abs(hsa00983_1-hsa00983_2) |
| 383 | hsa00250_1+hsa00250_2      |
| 384 | hsa00280_1+hsa00280_2      |
| 385 | abs(hsa04510_1-hsa04510_2) |
| 386 | hsa00640_1+hsa00640_2      |
| 387 | hsa03420_1+hsa03420_2      |
| 388 | abs(hsa00071_1-hsa00071_2) |
| 389 | abs(hsa03060_1-hsa03060_2) |
| 390 | hsa00534_1+hsa00534_2      |
| 391 | abs(hsa04742_1-hsa04742_2) |
| 392 | abs(hsa02010_1-hsa02010_2) |
| 393 | abs(hsa00330_1-hsa00330_2) |
| 394 | hsa04612_1+hsa04612_2      |
| 395 | hsa04974_1+hsa04974_2      |
| 396 | abs(hsa05320_1-hsa05320_2) |
| 397 | hsa04744_1+hsa04744_2      |
| 398 | hsa03018_1+hsa03018_2      |
| 399 | hsa00830_1+hsa00830_2      |
| 400 | hsa05340_1+hsa05340_2      |
| 401 | abs(hsa03010_1-hsa03010_2) |
| 402 | hsa03010_1+hsa03010_2      |
| 403 | hsa04140_1+hsa04140_2      |
| 404 | abs(hsa05340_1-hsa05340_2) |
| 405 | abs(hsa00051_1-hsa00051_2) |
| 406 | abs(hsa00512_1-hsa00512_2) |
| 407 | abs(hsa00640_1-hsa00640_2) |
| 408 | hsa00072_1+hsa00072_2      |
| 409 | abs(hsa05332_1-hsa05332_2) |
| 410 | abs(hsa00100_1-hsa00100_2) |
| 411 | hsa00100_1+hsa00100_2      |
| 412 | hsa03320_1+hsa03320_2      |
| 413 | abs(hsa00860_1-hsa00860_2) |
| 414 | hsa00310_1+hsa00310_2      |
| 415 | hsa00620_1+hsa00620_2      |
| 416 | abs(hsa04512_1-hsa04512_2) |
| 417 | abs(hsa00920_1-hsa00920_2) |
| 418 | hsa00900_1+hsa00900_2      |
| 419 | abs(hsa00534_1-hsa00534_2) |
| 420 | hsa04740_1+hsa04740_2      |
| 421 | abs(hsa04740_1-hsa04740_2) |
| 422 | hsa05410_1+hsa05410_2      |
| 423 | hsa00062_1+hsa00062_2      |

|     |                            |
|-----|----------------------------|
| 424 | hsa00561_1+hsa00561_2      |
| 425 | hsa00071_1+hsa00071_2      |
| 426 | abs(hsa04610_1-hsa04610_2) |
| 427 | hsa04710_1+hsa04710_2      |
| 428 | hsa05412_1+hsa05412_2      |
| 429 | hsa00500_1+hsa00500_2      |
| 430 | hsa02010_1+hsa02010_2      |
| 431 | hsa04340_1+hsa04340_2      |
| 432 | hsa00750_1+hsa00750_2      |
| 433 | abs(hsa00062_1-hsa00062_2) |
| 434 | abs(hsa00900_1-hsa00900_2) |
| 435 | abs(hsa05142_1-hsa05142_2) |
| 436 | hsa04141_1+hsa04141_2      |
| 437 | hsa04080_1+hsa04080_2      |
| 438 | abs(hsa00561_1-hsa00561_2) |
| 439 | abs(hsa00511_1-hsa00511_2) |
| 440 | abs(hsa03320_1-hsa03320_2) |
| 441 | hsa04260_1+hsa04260_2      |
| 442 | hsa00630_1+hsa00630_2      |
| 443 | abs(hsa05410_1-hsa05410_2) |
| 444 | hsa03022_1+hsa03022_2      |
| 445 | hsa00533_1+hsa00533_2      |
| 446 | abs(hsa04260_1-hsa04260_2) |
| 447 | F6 <sup>f</sup>            |
| 448 | abs(hsa05322_1-hsa05322_2) |
| 449 | hsa05322_1+hsa05322_2      |
| 450 | hsa00051_1+hsa00051_2      |
| 451 | hsa00770_1+hsa00770_2      |
| 452 | abs(hsa04146_1-hsa04146_2) |
| 453 | hsa04146_1+hsa04146_2      |
| 454 | abs(hsa05310_1-hsa05310_2) |
| 455 | hsa03450_1+hsa03450_2      |
| 456 | abs(hsa00750_1-hsa00750_2) |
| 457 | abs(hsa05412_1-hsa05412_2) |
| 458 | abs(hsa00072_1-hsa00072_2) |
| 459 | hsa04614_1+hsa04614_2      |
| 460 | hsa00512_1+hsa00512_2      |
| 461 | abs(hsa00650_1-hsa00650_2) |
| 462 | abs(hsa04630_1-hsa04630_2) |
| 463 | hsa01040_1+hsa01040_2      |
| 464 | abs(hsa00533_1-hsa00533_2) |

<sup>a</sup> The confidence score of two drugs in the combination, see “Chemical interaction” of Section “Features of drug combinations” for detail.

- <sup>b</sup> The maximum confidence score between targets of drug  $d_1$  and targets of  $d_2$ , see **Eq. 1** and related text in Section “Features of drug combinations” for detail.
- <sup>c</sup> The mean value of confidence scores between targets of drug  $d_1$  and targets of  $d_2$ , see **Eq. 1** and related text in Section “Features of drug combinations” for detail.
- <sup>d</sup> The absolute value of difference of maximum confidence score between targets of drug  $d_1$  and maximum confidence score between targets of drug  $d_2$ , see **Eq. 2** and related text in Section “Features of drug combinations” for detail.
- <sup>e</sup> The absolute value of difference of mean value of confidence scores between targets of drug  $d_1$  and mean value of confidence score between targets of drug  $d_2$ , see **Eq. 2** and related text in Section “Features of drug combinations” for detail.
- <sup>f</sup> The sum of maximum confidence score between targets of drug  $d_1$  and maximum confidence score between targets of drug  $d_2$ , see **Eq. 2** and related text in Section “Features of drug combinations” for detail.
- <sup>g</sup> The sum of mean value of confidence scores between targets of drug  $d_1$  and mean value of confidence score between targets of drug  $d_2$ , see **Eq. 2** and related text in Section “Features of drug combinations” for detail.
- <sup>h</sup> The sum of enrichment score of drug  $d_1$  and pathway hsa04964 (“Proximal tubule bicarbonate reclamation”) and enrichment score of drug  $d_2$  and pathway hsa04964 (“Proximal tubule bicarbonate reclamation”), see **Eq. 3** and related text in Section “Features of drug combinations” for detail.
- <sup>i</sup> The absolute value of the difference of enrichment score of drug  $d_1$  and pathway hsa00910 (“Nitrogen metabolism”) and enrichment score of drug  $d_2$  and pathway hsa00910 (“Nitrogen metabolism”), see **Eq. 3** and related text in Section “Features of drug combinations” for detail.

## (II) mRMR features list

| Order | Feature name                            |
|-------|-----------------------------------------|
| 1     | F1 <sup>a</sup>                         |
| 2     | abs(hsa05215_1-hsa05215_2) <sup>h</sup> |
| 3     | hsa04964_1+hsa04964_2 <sup>i</sup>      |
| 4     | F2 <sup>b</sup>                         |
| 5     | abs(hsa00140_1-hsa00140_2)              |
| 6     | hsa04145_1+hsa04145_2                   |
| 7     | abs(hsa05150_1-hsa05150_2)              |
| 8     | abs(hsa04973_1-hsa04973_2)              |
| 9     | abs(hsa04340_1-hsa04340_2)              |
| 10    | hsa00052_1+hsa00052_2                   |
| 11    | abs(hsa04310_1-hsa04310_2)              |
| 12    | hsa00531_1+hsa00531_2                   |
| 13    | hsa04972_1+hsa04972_2                   |
| 14    | abs(hsa04976_1-hsa04976_2)              |
| 15    | abs(hsa03018_1-hsa03018_2)              |
| 16    | abs(hsa04744_1-hsa04744_2)              |
| 17    | abs(hsa04977_1-hsa04977_2)              |
| 18    | abs(hsa04330_1-hsa04330_2)              |
| 19    | abs(hsa00430_1-hsa00430_2)              |
| 20    | abs(hsa05130_1-hsa05130_2)              |
| 21    | hsa00920_1+hsa00920_2                   |
| 22    | abs(hsa00785_1-hsa00785_2)              |
| 23    | hsa05020_1+hsa05020_2                   |
| 24    | hsa00511_1+hsa00511_2                   |
| 25    | F3 <sup>c</sup>                         |
| 26    | abs(hsa04320_1-hsa04320_2)              |
| 27    | abs(hsa00520_1-hsa00520_2)              |
| 28    | abs(hsa00310_1-hsa00310_2)              |
| 29    | abs(hsa00270_1-hsa00270_2)              |
| 30    | abs(hsa04115_1-hsa04115_2)              |
| 31    | hsa04966_1+hsa04966_2                   |
| 32    | abs(hsa00830_1-hsa00830_2)              |
| 33    | abs(hsa00910_1-hsa00910_2)              |
| 34    | abs(hsa05217_1-hsa05217_2)              |
| 35    | abs(hsa05010_1-hsa05010_2)              |
| 36    | abs(hsa04150_1-hsa04150_2)              |
| 37    | hsa00532_1+hsa00532_2                   |
| 38    | abs(hsa04514_1-hsa04514_2)              |
| 39    | abs(hsa04975_1-hsa04975_2)              |
| 40    | hsa05110_1+hsa05110_2                   |

|    |                            |
|----|----------------------------|
| 41 | abs(hsa05146_1-hsa05146_2) |
| 42 | abs(hsa05012_1-hsa05012_2) |
| 43 | abs(hsa04614_1-hsa04614_2) |
| 44 | hsa04130_1+hsa04130_2      |
| 45 | hsa00480_1+hsa00480_2      |
| 46 | hsa05211_1+hsa05211_2      |
| 47 | abs(hsa05322_1-hsa05322_2) |
| 48 | abs(hsa04964_1-hsa04964_2) |
| 49 | hsa04120_1+hsa04120_2      |
| 50 | hsa00780_1+hsa00780_2      |
| 51 | abs(hsa00630_1-hsa00630_2) |
| 52 | abs(hsa00510_1-hsa00510_2) |
| 53 | abs(hsa00061_1-hsa00061_2) |
| 54 | abs(hsa05020_1-hsa05020_2) |
| 55 | abs(hsa00232_1-hsa00232_2) |
| 56 | hsa00910_1+hsa00910_2      |
| 57 | abs(hsa04070_1-hsa04070_2) |
| 58 | hsa04740_1+hsa04740_2      |
| 59 | hsa04970_1+hsa04970_2      |
| 60 | hsa00471_1+hsa00471_2      |
| 61 | hsa04142_1+hsa04142_2      |
| 62 | abs(hsa03010_1-hsa03010_2) |
| 63 | abs(hsa04080_1-hsa04080_2) |
| 64 | abs(hsa00300_1-hsa00300_2) |
| 65 | abs(hsa00400_1-hsa00400_2) |
| 66 | abs(hsa05120_1-hsa05120_2) |
| 67 | abs(hsa00760_1-hsa00760_2) |
| 68 | abs(hsa04960_1-hsa04960_2) |
| 69 | abs(hsa04950_1-hsa04950_2) |
| 70 | abs(hsa04540_1-hsa04540_2) |
| 71 | abs(hsa04670_1-hsa04670_2) |
| 72 | abs(hsa05110_1-hsa05110_2) |
| 73 | abs(hsa03450_1-hsa03450_2) |
| 74 | abs(hsa04940_1-hsa04940_2) |
| 75 | abs(hsa00472_1-hsa00472_2) |
| 76 | hsa03010_1+hsa03010_2      |
| 77 | abs(hsa05016_1-hsa05016_2) |
| 78 | abs(hsa04910_1-hsa04910_2) |
| 79 | abs(hsa04370_1-hsa04370_2) |
| 80 | abs(hsa04962_1-hsa04962_2) |
| 81 | hsa00520_1+hsa00520_2      |
| 82 | hsa05322_1+hsa05322_2      |
| 83 | abs(hsa00770_1-hsa00770_2) |

|     |                            |
|-----|----------------------------|
| 84  | hsa00430_1+hsa00430_2      |
| 85  | hsa05130_1+hsa05130_2      |
| 86  | abs(hsa00730_1-hsa00730_2) |
| 87  | abs(hsa04140_1-hsa04140_2) |
| 88  | abs(hsa04710_1-hsa04710_2) |
| 89  | abs(hsa05412_1-hsa05412_2) |
| 90  | abs(hsa04630_1-hsa04630_2) |
| 91  | abs(hsa04740_1-hsa04740_2) |
| 92  | hsa04960_1+hsa04960_2      |
| 93  | abs(hsa00524_1-hsa00524_2) |
| 94  | abs(hsa04120_1-hsa04120_2) |
| 95  | abs(hsa00603_1-hsa00603_2) |
| 96  | abs(hsa04720_1-hsa04720_2) |
| 97  | hsa05217_1+hsa05217_2      |
| 98  | abs(hsa04512_1-hsa04512_2) |
| 99  | abs(hsa04966_1-hsa04966_2) |
| 100 | hsa00120_1+hsa00120_2      |
| 101 | abs(hsa04141_1-hsa04141_2) |
| 102 | abs(hsa00563_1-hsa00563_2) |
| 103 | abs(hsa00790_1-hsa00790_2) |
| 104 | abs(hsa04640_1-hsa04640_2) |
| 105 | hsa04330_1+hsa04330_2      |
| 106 | abs(hsa04974_1-hsa04974_2) |
| 107 | hsa02010_1+hsa02010_2      |
| 108 | abs(hsa04650_1-hsa04650_2) |
| 109 | hsa00350_1+hsa00350_2      |
| 110 | hsa00534_1+hsa00534_2      |
| 111 | abs(hsa03022_1-hsa03022_2) |
| 112 | abs(hsa05310_1-hsa05310_2) |
| 113 | abs(hsa00130_1-hsa00130_2) |
| 114 | abs(hsa00290_1-hsa00290_2) |
| 115 | abs(hsa00780_1-hsa00780_2) |
| 116 | abs(hsa04970_1-hsa04970_2) |
| 117 | abs(hsa00920_1-hsa00920_2) |
| 118 | F5 <sup>e</sup>            |
| 119 | abs(hsa04530_1-hsa04530_2) |
| 120 | abs(hsa05220_1-hsa05220_2) |
| 121 | abs(hsa04142_1-hsa04142_2) |
| 122 | abs(hsa00650_1-hsa00650_2) |
| 123 | abs(hsa00480_1-hsa00480_2) |
| 124 | abs(hsa04742_1-hsa04742_2) |
| 125 | hsa00190_1+hsa00190_2      |
| 126 | hsa05100_1+hsa05100_2      |

|     |                            |
|-----|----------------------------|
| 127 | hsa00230_1+hsa00230_2      |
| 128 | abs(hsa00052_1-hsa00052_2) |
| 129 | hsa04122_1+hsa04122_2      |
| 130 | hsa05010_1+hsa05010_2      |
| 131 | abs(hsa04621_1-hsa04621_2) |
| 132 | abs(hsa04114_1-hsa04114_2) |
| 133 | hsa04710_1+hsa04710_2      |
| 134 | abs(hsa04130_1-hsa04130_2) |
| 135 | hsa00232_1+hsa00232_2      |
| 136 | abs(hsa05131_1-hsa05131_2) |
| 137 | abs(hsa00531_1-hsa00531_2) |
| 138 | hsa00601_1+hsa00601_2      |
| 139 | abs(hsa00450_1-hsa00450_2) |
| 140 | abs(hsa00532_1-hsa00532_2) |
| 141 | abs(hsa04145_1-hsa04145_2) |
| 142 | abs(hsa04360_1-hsa04360_2) |
| 143 | hsa00785_1+hsa00785_2      |
| 144 | abs(hsa04144_1-hsa04144_2) |
| 145 | abs(hsa03050_1-hsa03050_2) |
| 146 | abs(hsa00982_1-hsa00982_2) |
| 147 | abs(hsa04914_1-hsa04914_2) |
| 148 | hsa04514_1+hsa04514_2      |
| 149 | hsa04910_1+hsa04910_2      |
| 150 | hsa00400_1+hsa00400_2      |
| 151 | abs(hsa04610_1-hsa04610_2) |
| 152 | abs(hsa03410_1-hsa03410_2) |
| 153 | abs(hsa00190_1-hsa00190_2) |
| 154 | hsa00300_1+hsa00300_2      |
| 155 | abs(hsa04623_1-hsa04623_2) |
| 156 | hsa00062_1+hsa00062_2      |
| 157 | abs(hsa04020_1-hsa04020_2) |
| 158 | abs(hsa00601_1-hsa00601_2) |
| 159 | abs(hsa02010_1-hsa02010_2) |
| 160 | hsa00603_1+hsa00603_2      |
| 161 | hsa04744_1+hsa04744_2      |
| 162 | hsa00340_1+hsa00340_2      |
| 163 | abs(hsa05222_1-hsa05222_2) |
| 164 | hsa03015_1+hsa03015_2      |
| 165 | hsa00510_1+hsa00510_2      |
| 166 | hsa00982_1+hsa00982_2      |
| 167 | abs(hsa00280_1-hsa00280_2) |
| 168 | hsa00563_1+hsa00563_2      |
| 169 | abs(hsa05414_1-hsa05414_2) |



|     |                            |
|-----|----------------------------|
| 170 | hsa04622_1+hsa04622_2      |
| 171 | hsa04141_1+hsa04141_2      |
| 172 | abs(hsa00534_1-hsa00534_2) |
| 173 | abs(hsa04666_1-hsa04666_2) |
| 174 | hsa04150_1+hsa04150_2      |
| 175 | hsa00760_1+hsa00760_2      |
| 176 | hsa04640_1+hsa04640_2      |
| 177 | F4 <sup>d</sup>            |
| 178 | abs(hsa00051_1-hsa00051_2) |
| 179 | abs(hsa05323_1-hsa05323_2) |
| 180 | hsa04610_1+hsa04610_2      |
| 181 | abs(hsa03060_1-hsa03060_2) |
| 182 | hsa05012_1+hsa05012_2      |
| 183 | hsa04140_1+hsa04140_2      |
| 184 | hsa00650_1+hsa00650_2      |
| 185 | abs(hsa00514_1-hsa00514_2) |
| 186 | hsa00330_1+hsa00330_2      |
| 187 | abs(hsa00604_1-hsa00604_2) |
| 188 | abs(hsa04122_1-hsa04122_2) |
| 189 | hsa04950_1+hsa04950_2      |
| 190 | abs(hsa00471_1-hsa00471_2) |
| 191 | hsa04512_1+hsa04512_2      |
| 192 | abs(hsa05143_1-hsa05143_2) |
| 193 | abs(hsa00240_1-hsa00240_2) |
| 194 | hsa00770_1+hsa00770_2      |
| 195 | abs(hsa00460_1-hsa00460_2) |
| 196 | abs(hsa04916_1-hsa04916_2) |
| 197 | abs(hsa04810_1-hsa04810_2) |
| 198 | abs(hsa00100_1-hsa00100_2) |
| 199 | abs(hsa05332_1-hsa05332_2) |
| 200 | abs(hsa00640_1-hsa00640_2) |
| 201 | abs(hsa00230_1-hsa00230_2) |
| 202 | abs(hsa05410_1-hsa05410_2) |
| 203 | abs(hsa05340_1-hsa05340_2) |
| 204 | abs(hsa00591_1-hsa00591_2) |
| 205 | hsa00380_1+hsa00380_2      |
| 206 | hsa03022_1+hsa03022_2      |
| 207 | hsa04070_1+hsa04070_2      |
| 208 | abs(hsa00120_1-hsa00120_2) |
| 209 | abs(hsa05214_1-hsa05214_2) |
| 210 | abs(hsa00533_1-hsa00533_2) |
| 211 | hsa00524_1+hsa00524_2      |
| 212 | hsa00730_1+hsa00730_2      |

|     |                            |
|-----|----------------------------|
| 213 | abs(hsa04612_1-hsa04612_2) |
| 214 | hsa04080_1+hsa04080_2      |
| 215 | abs(hsa00750_1-hsa00750_2) |
| 216 | hsa04114_1+hsa04114_2      |
| 217 | abs(hsa00500_1-hsa00500_2) |
| 218 | abs(hsa00511_1-hsa00511_2) |
| 219 | hsa03050_1+hsa03050_2      |
| 220 | hsa04974_1+hsa04974_2      |
| 221 | abs(hsa05416_1-hsa05416_2) |
| 222 | hsa05150_1+hsa05150_2      |
| 223 | hsa00030_1+hsa00030_2      |
| 224 | abs(hsa04730_1-hsa04730_2) |
| 225 | abs(hsa00350_1-hsa00350_2) |
| 226 | hsa04973_1+hsa04973_2      |
| 227 | hsa04260_1+hsa04260_2      |
| 228 | abs(hsa04062_1-hsa04062_2) |
| 229 | hsa01040_1+hsa01040_2      |
| 230 | hsa03060_1+hsa03060_2      |
| 231 | abs(hsa05014_1-hsa05014_2) |
| 232 | abs(hsa04930_1-hsa04930_2) |
| 233 | hsa00790_1+hsa00790_2      |
| 234 | hsa03018_1+hsa03018_2      |
| 235 | abs(hsa04672_1-hsa04672_2) |
| 236 | abs(hsa04510_1-hsa04510_2) |
| 237 | abs(hsa03030_1-hsa03030_2) |
| 238 | abs(hsa00330_1-hsa00330_2) |
| 239 | hsa00630_1+hsa00630_2      |
| 240 | abs(hsa05218_1-hsa05218_2) |
| 241 | hsa00533_1+hsa00533_2      |
| 242 | abs(hsa00600_1-hsa00600_2) |
| 243 | abs(hsa00062_1-hsa00062_2) |
| 244 | abs(hsa00512_1-hsa00512_2) |
| 245 | abs(hsa03015_1-hsa03015_2) |
| 246 | hsa05214_1+hsa05214_2      |
| 247 | hsa00020_1+hsa00020_2      |
| 248 | hsa00270_1+hsa00270_2      |
| 249 | hsa05412_1+hsa05412_2      |
| 250 | hsa00514_1+hsa00514_2      |
| 251 | abs(hsa04350_1-hsa04350_2) |
| 252 | hsa00100_1+hsa00100_2      |
| 253 | hsa03020_1+hsa03020_2      |
| 254 | hsa00051_1+hsa00051_2      |
| 255 | hsa00460_1+hsa00460_2      |

|     |                            |
|-----|----------------------------|
| 256 | abs(hsa00340_1-hsa00340_2) |
| 257 | abs(hsa04971_1-hsa04971_2) |
| 258 | hsa00140_1+hsa00140_2      |
| 259 | abs(hsa04664_1-hsa04664_2) |
| 260 | hsa00740_1+hsa00740_2      |
| 261 | hsa00310_1+hsa00310_2      |
| 262 | abs(hsa04260_1-hsa04260_2) |
| 263 | abs(hsa05320_1-hsa05320_2) |
| 264 | abs(hsa03440_1-hsa03440_2) |
| 265 | abs(hsa00030_1-hsa00030_2) |
| 266 | abs(hsa05144_1-hsa05144_2) |
| 267 | hsa00472_1+hsa00472_2      |
| 268 | hsa04530_1+hsa04530_2      |
| 269 | hsa00670_1+hsa00670_2      |
| 270 | abs(hsa03020_1-hsa03020_2) |
| 271 | abs(hsa04920_1-hsa04920_2) |
| 272 | F7 <sup>g</sup>            |
| 273 | hsa00500_1+hsa00500_2      |
| 274 | abs(hsa04010_1-hsa04010_2) |
| 275 | abs(hsa04972_1-hsa04972_2) |
| 276 | hsa00900_1+hsa00900_2      |
| 277 | abs(hsa00010_1-hsa00010_2) |
| 278 | abs(hsa03013_1-hsa03013_2) |
| 279 | abs(hsa04060_1-hsa04060_2) |
| 280 | abs(hsa00360_1-hsa00360_2) |
| 281 | abs(hsa01040_1-hsa01040_2) |
| 282 | abs(hsa00670_1-hsa00670_2) |
| 283 | hsa04976_1+hsa04976_2      |
| 284 | hsa05016_1+hsa05016_2      |
| 285 | hsa04940_1+hsa04940_2      |
| 286 | abs(hsa00562_1-hsa00562_2) |
| 287 | hsa05410_1+hsa05410_2      |
| 288 | hsa04340_1+hsa04340_2      |
| 289 | abs(hsa05100_1-hsa05100_2) |
| 290 | hsa03008_1+hsa03008_2      |
| 291 | abs(hsa00040_1-hsa00040_2) |
| 292 | abs(hsa04146_1-hsa04146_2) |
| 293 | abs(hsa00020_1-hsa00020_2) |
| 294 | hsa05310_1+hsa05310_2      |
| 295 | hsa00130_1+hsa00130_2      |
| 296 | abs(hsa00590_1-hsa00590_2) |
| 297 | hsa00290_1+hsa00290_2      |
| 298 | abs(hsa05330_1-hsa05330_2) |

|     |                            |
|-----|----------------------------|
| 299 | abs(hsa00250_1-hsa00250_2) |
| 300 | abs(hsa04520_1-hsa04520_2) |
| 301 | abs(hsa03008_1-hsa03008_2) |
| 302 | hsa00512_1+hsa00512_2      |
| 303 | abs(hsa00380_1-hsa00380_2) |
| 304 | hsa03450_1+hsa03450_2      |
| 305 | hsa00010_1+hsa00010_2      |
| 306 | abs(hsa00900_1-hsa00900_2) |
| 307 | hsa00450_1+hsa00450_2      |
| 308 | abs(hsa03320_1-hsa03320_2) |
| 309 | hsa00040_1+hsa00040_2      |
| 310 | abs(hsa00740_1-hsa00740_2) |
| 311 | hsa04930_1+hsa04930_2      |
| 312 | abs(hsa00564_1-hsa00564_2) |
| 313 | abs(hsa04110_1-hsa04110_2) |
| 314 | abs(hsa00970_1-hsa00970_2) |
| 315 | abs(hsa04622_1-hsa04622_2) |
| 316 | hsa00360_1+hsa00360_2      |
| 317 | hsa04612_1+hsa04612_2      |
| 318 | hsa00061_1+hsa00061_2      |
| 319 | abs(hsa00620_1-hsa00620_2) |
| 320 | hsa04962_1+hsa04962_2      |
| 321 | abs(hsa03040_1-hsa03040_2) |
| 322 | hsa00600_1+hsa00600_2      |
| 323 | hsa00750_1+hsa00750_2      |
| 324 | hsa04146_1+hsa04146_2      |
| 325 | hsa05120_1+hsa05120_2      |
| 326 | abs(hsa00053_1-hsa00053_2) |
| 327 | abs(hsa05219_1-hsa05219_2) |
| 328 | hsa04614_1+hsa04614_2      |
| 329 | abs(hsa04912_1-hsa04912_2) |
| 330 | hsa05416_1+hsa05416_2      |
| 331 | hsa00072_1+hsa00072_2      |
| 332 | hsa05414_1+hsa05414_2      |
| 333 | abs(hsa05145_1-hsa05145_2) |
| 334 | hsa04110_1+hsa04110_2      |
| 335 | hsa00071_1+hsa00071_2      |
| 336 | abs(hsa00980_1-hsa00980_2) |
| 337 | hsa04310_1+hsa04310_2      |
| 338 | hsa00970_1+hsa00970_2      |
| 339 | hsa00250_1+hsa00250_2      |
| 340 | hsa03320_1+hsa03320_2      |
| 341 | abs(hsa04012_1-hsa04012_2) |

|     |                            |
|-----|----------------------------|
| 342 | abs(hsa01100_1-hsa01100_2) |
| 343 | hsa00604_1+hsa00604_2      |
| 344 | hsa03410_1+hsa03410_2      |
| 345 | hsa05340_1+hsa05340_2      |
| 346 | hsa04144_1+hsa04144_2      |
| 347 | abs(hsa05216_1-hsa05216_2) |
| 348 | hsa00562_1+hsa00562_2      |
| 349 | hsa00053_1+hsa00053_2      |
| 350 | abs(hsa04270_1-hsa04270_2) |
| 351 | hsa03013_1+hsa03013_2      |
| 352 | hsa00410_1+hsa00410_2      |
| 353 | abs(hsa05211_1-hsa05211_2) |
| 354 | abs(hsa00071_1-hsa00071_2) |
| 355 | hsa04977_1+hsa04977_2      |
| 356 | abs(hsa00565_1-hsa00565_2) |
| 357 | hsa00830_1+hsa00830_2      |
| 358 | hsa00620_1+hsa00620_2      |
| 359 | hsa03440_1+hsa03440_2      |
| 360 | abs(hsa04660_1-hsa04660_2) |
| 361 | hsa05332_1+hsa05332_2      |
| 362 | abs(hsa00260_1-hsa00260_2) |
| 363 | hsa04666_1+hsa04666_2      |
| 364 | abs(hsa00860_1-hsa00860_2) |
| 365 | hsa00240_1+hsa00240_2      |
| 366 | F6 <sup>f</sup>            |
| 367 | hsa03040_1+hsa03040_2      |
| 368 | abs(hsa00072_1-hsa00072_2) |
| 369 | abs(hsa05142_1-hsa05142_2) |
| 370 | abs(hsa00410_1-hsa00410_2) |
| 371 | hsa05320_1+hsa05320_2      |
| 372 | hsa04720_1+hsa04720_2      |
| 373 | abs(hsa00561_1-hsa00561_2) |
| 374 | hsa04810_1+hsa04810_2      |
| 375 | hsa04115_1+hsa04115_2      |
| 376 | abs(hsa00592_1-hsa00592_2) |
| 377 | abs(hsa05223_1-hsa05223_2) |
| 378 | abs(hsa00983_1-hsa00983_2) |
| 379 | abs(hsa03420_1-hsa03420_2) |
| 380 | hsa05014_1+hsa05014_2      |
| 381 | hsa04350_1+hsa04350_2      |
| 382 | hsa00860_1+hsa00860_2      |
| 383 | hsa00561_1+hsa00561_2      |
| 384 | abs(hsa04722_1-hsa04722_2) |

|     |                            |
|-----|----------------------------|
| 385 | hsa00591_1+hsa00591_2      |
| 386 | hsa04971_1+hsa04971_2      |
| 387 | hsa04320_1+hsa04320_2      |
| 388 | hsa03030_1+hsa03030_2      |
| 389 | hsa04975_1+hsa04975_2      |
| 390 | hsa05222_1+hsa05222_2      |
| 391 | hsa00980_1+hsa00980_2      |
| 392 | hsa04742_1+hsa04742_2      |
| 393 | abs(hsa05200_1-hsa05200_2) |
| 394 | hsa00280_1+hsa00280_2      |
| 395 | hsa05330_1+hsa05330_2      |
| 396 | hsa05218_1+hsa05218_2      |
| 397 | abs(hsa03430_1-hsa03430_2) |
| 398 | abs(hsa05140_1-hsa05140_2) |
| 399 | hsa01100_1+hsa01100_2      |
| 400 | hsa04360_1+hsa04360_2      |
| 401 | hsa00565_1+hsa00565_2      |
| 402 | hsa04062_1+hsa04062_2      |
| 403 | hsa00983_1+hsa00983_2      |
| 404 | hsa00640_1+hsa00640_2      |
| 405 | abs(hsa05160_1-hsa05160_2) |
| 406 | hsa04540_1+hsa04540_2      |
| 407 | hsa00590_1+hsa00590_2      |
| 408 | hsa00260_1+hsa00260_2      |
| 409 | abs(hsa05213_1-hsa05213_2) |
| 410 | hsa04672_1+hsa04672_2      |
| 411 | hsa04630_1+hsa04630_2      |
| 412 | abs(hsa04662_1-hsa04662_2) |
| 413 | hsa03430_1+hsa03430_2      |
| 414 | hsa04914_1+hsa04914_2      |
| 415 | abs(hsa05210_1-hsa05210_2) |
| 416 | hsa04020_1+hsa04020_2      |
| 417 | hsa04670_1+hsa04670_2      |
| 418 | hsa00592_1+hsa00592_2      |
| 419 | abs(hsa05212_1-hsa05212_2) |
| 420 | hsa03420_1+hsa03420_2      |
| 421 | hsa04916_1+hsa04916_2      |
| 422 | abs(hsa04620_1-hsa04620_2) |
| 423 | hsa00564_1+hsa00564_2      |
| 424 | hsa04520_1+hsa04520_2      |
| 425 | hsa05146_1+hsa05146_2      |
| 426 | hsa04920_1+hsa04920_2      |
| 427 | abs(hsa04210_1-hsa04210_2) |

|     |                            |
|-----|----------------------------|
| 428 | hsa04730_1+hsa04730_2      |
| 429 | hsa04510_1+hsa04510_2      |
| 430 | hsa04620_1+hsa04620_2      |
| 431 | abs(hsa05221_1-hsa05221_2) |
| 432 | hsa04270_1+hsa04270_2      |
| 433 | hsa05143_1+hsa05143_2      |
| 434 | hsa05213_1+hsa05213_2      |
| 435 | hsa05216_1+hsa05216_2      |
| 436 | hsa04623_1+hsa04623_2      |
| 437 | hsa05144_1+hsa05144_2      |
| 438 | hsa05323_1+hsa05323_2      |
| 439 | hsa04722_1+hsa04722_2      |
| 440 | abs(hsa04380_1-hsa04380_2) |
| 441 | hsa04621_1+hsa04621_2      |
| 442 | hsa04060_1+hsa04060_2      |
| 443 | hsa05131_1+hsa05131_2      |
| 444 | hsa04210_1+hsa04210_2      |
| 445 | hsa05215_1+hsa05215_2      |
| 446 | hsa04650_1+hsa04650_2      |
| 447 | hsa05160_1+hsa05160_2      |
| 448 | hsa05223_1+hsa05223_2      |
| 449 | hsa04912_1+hsa04912_2      |
| 450 | hsa05219_1+hsa05219_2      |
| 451 | hsa04380_1+hsa04380_2      |
| 452 | hsa04012_1+hsa04012_2      |
| 453 | hsa05220_1+hsa05220_2      |
| 454 | hsa04370_1+hsa04370_2      |
| 455 | hsa05221_1+hsa05221_2      |
| 456 | hsa05142_1+hsa05142_2      |
| 457 | hsa04010_1+hsa04010_2      |
| 458 | hsa05145_1+hsa05145_2      |
| 459 | hsa04660_1+hsa04660_2      |
| 460 | hsa05200_1+hsa05200_2      |
| 461 | hsa05140_1+hsa05140_2      |
| 462 | hsa04662_1+hsa04662_2      |
| 463 | hsa05210_1+hsa05210_2      |
| 464 | hsa04664_1+hsa04664_2      |
| 465 | hsa05212_1+hsa05212_2      |

<sup>a</sup> The confidence score of two drugs in the combination, see “Chemical interaction” of Section “Features of drug combinations” for detail.

<sup>b</sup> The maximum confidence score between targets of drug  $d_1$  and targets of  $d_2$ , see **Eq. 1** and related text in Section “Features of drug combinations” for detail.

<sup>c</sup> The mean value of confidence scores between targets of drug  $d_1$  and targets of  $d_2$ , see **Eq. 1** and related text in Section “Features of drug combinations” for detail.

<sup>d</sup> The absolute value of difference of maximum confidence score between targets of drug  $d_1$  and maximum confidence score between targets of drug  $d_2$ , see **Eq. 2** and related text in Section “Features of drug combinations” for detail.

<sup>e</sup> The absolute value of difference of mean value of confidence scores between targets of drug  $d_1$  and mean value of confidence score between targets of drug  $d_2$ , see **Eq. 2** and related text in Section “Features of drug combinations” for detail.

<sup>f</sup> The sum of maximum confidence score between targets of drug  $d_1$  and maximum confidence score between targets of drug  $d_2$ , see **Eq. 2** and related text in Section “Features of drug combinations” for detail.

<sup>g</sup> The sum of mean value of confidence scores between targets of drug  $d_1$  and mean value of confidence score between targets of drug  $d_2$ , see **Eq. 2** and related text in Section “Features of drug combinations” for detail.

<sup>h</sup> The absolute value of the difference of enrichment score of drug  $d_1$  and pathway hsa05215 (“Prostate cancer”) and enrichment score of drug  $d_2$  and pathway hsa05215 (“Prostate cancer”), see **Eq. 3** and related text in Section “Features of drug combinations” for detail.

<sup>i</sup> The sum of enrichment score of drug  $d_1$  and pathway hsa04964 (“Proximal tubule bicarbonate reclamation”) and enrichment score of drug  $d_2$  and pathway hsa04964 (“Proximal tubule bicarbonate reclamation”), see **Eq. 3** and related text in Section “Features of drug combinations” for detail.



## (III) Pathway ID vs Pathway name

| <b>Pathway ID</b> | <b>Pathway name</b>                                 |
|-------------------|-----------------------------------------------------|
| hsa00010          | Glycolysis / Gluconeogenesis                        |
| hsa00020          | Citrate cycle (TCA cycle)                           |
| hsa00030          | Pentose phosphate pathway                           |
| hsa00040          | Pentose and glucuronate interconversions            |
| hsa00051          | Fructose and mannose metabolism                     |
| hsa00052          | Galactose metabolism                                |
| hsa00053          | Ascorbate and aldarate metabolism                   |
| hsa00061          | Fatty acid biosynthesis                             |
| hsa00062          | Fatty acid elongation in mitochondria               |
| hsa00071          | Fatty acid metabolism                               |
| hsa00072          | Synthesis and degradation of ketone bodies          |
| hsa00100          | Steroid biosynthesis                                |
| hsa00120          | Primary bile acid biosynthesis                      |
| hsa00130          | Ubiquinone and other terpenoid-quinone biosynthesis |
| hsa00140          | Steroid hormone biosynthesis                        |
| hsa00190          | Oxidative phosphorylation                           |
| hsa00230          | Purine metabolism                                   |
| hsa00232          | Caffeine metabolism                                 |
| hsa00240          | Pyrimidine metabolism                               |
| hsa00250          | Alanine, aspartate and glutamate metabolism         |
| hsa00260          | Glycine, serine and threonine metabolism            |
| hsa00270          | Cysteine and methionine metabolism                  |
| hsa00280          | Valine, leucine and isoleucine degradation          |
| hsa00290          | Valine, leucine and isoleucine biosynthesis         |
| hsa00300          | Lysine biosynthesis                                 |
| hsa00310          | Lysine degradation                                  |
| hsa00330          | Arginine and proline metabolism                     |
| hsa00340          | Histidine metabolism                                |
| hsa00350          | Tyrosine metabolism                                 |
| hsa00360          | Phenylalanine metabolism                            |
| hsa00380          | Tryptophan metabolism                               |
| hsa00400          | Phenylalanine, tyrosine and tryptophan biosynthesis |
| hsa00410          | beta-Alanine metabolism                             |
| hsa00430          | Taurine and hypotaurine metabolism                  |
| hsa00450          | Selenocompound metabolism                           |
| hsa00460          | Cyanoamino acid metabolism                          |
| hsa00471          | D-Glutamine and D-glutamate metabolism              |
| hsa00472          | D-Arginine and D-ornithine metabolism               |
| hsa00480          | Glutathione metabolism                              |
| hsa00500          | Starch and sucrose metabolism                       |

|          |                                                            |
|----------|------------------------------------------------------------|
| hsa00510 | N-Glycan biosynthesis                                      |
| hsa00511 | Other glycan degradation                                   |
| hsa00512 | Mucin type O-Glycan biosynthesis                           |
| hsa00514 | Other types of O-glycan biosynthesis                       |
| hsa00520 | Amino sugar and nucleotide sugar metabolism                |
| hsa00524 | Butirosin and neomycin biosynthesis                        |
| hsa00531 | Glycosaminoglycan degradation                              |
| hsa00532 | Glycosaminoglycan biosynthesis - chondroitin sulfate       |
| hsa00533 | Glycosaminoglycan biosynthesis - keratan sulfate           |
| hsa00534 | Glycosaminoglycan biosynthesis - heparan sulfate           |
| hsa00561 | Glycerolipid metabolism                                    |
| hsa00562 | Inositol phosphate metabolism                              |
| hsa00563 | Glycosylphosphatidylinositol(GPI)-anchor biosynthesis      |
| hsa00564 | Glycerophospholipid metabolism                             |
| hsa00565 | Ether lipid metabolism                                     |
| hsa00590 | Arachidonic acid metabolism                                |
| hsa00591 | Linoleic acid metabolism                                   |
| hsa00592 | alpha-Linolenic acid metabolism                            |
| hsa00600 | Sphingolipid metabolism                                    |
| hsa00601 | Glycosphingolipid biosynthesis - lacto and neolacto series |
| hsa00603 | Glycosphingolipid biosynthesis - globo series              |
| hsa00604 | Glycosphingolipid biosynthesis - ganglio series            |
| hsa00620 | Pyruvate metabolism                                        |
| hsa00630 | Glyoxylate and dicarboxylate metabolism                    |
| hsa00640 | Propanoate metabolism                                      |
| hsa00650 | Butanoate metabolism                                       |
| hsa00670 | One carbon pool by folate                                  |
| hsa00730 | Thiamine metabolism                                        |
| hsa00740 | Riboflavin metabolism                                      |
| hsa00750 | Vitamin B6 metabolism                                      |
| hsa00760 | Nicotinate and nicotinamide metabolism                     |
| hsa00770 | Pantothenate and CoA biosynthesis                          |
| hsa00780 | Biotin metabolism                                          |
| hsa00785 | Lipoic acid metabolism                                     |
| hsa00790 | Folate biosynthesis                                        |
| hsa00830 | Retinol metabolism                                         |
| hsa00860 | Porphyrin and chlorophyll metabolism                       |
| hsa00900 | Terpenoid backbone biosynthesis                            |
| hsa00910 | Nitrogen metabolism                                        |
| hsa00920 | Sulfur metabolism                                          |
| hsa00970 | Aminoacyl-tRNA biosynthesis                                |
| hsa00980 | Metabolism of xenobiotics by cytochrome P450               |
| hsa00982 | Drug metabolism - cytochrome P450                          |

|          |                                             |
|----------|---------------------------------------------|
| hsa00983 | Drug metabolism - other enzymes             |
| hsa01040 | Biosynthesis of unsaturated fatty acids     |
| hsa01100 | Metabolic pathways                          |
| hsa02010 | ABC transporters                            |
| hsa03008 | Ribosome biogenesis in eukaryotes           |
| hsa03010 | Ribosome                                    |
| hsa03013 | RNA transport                               |
| hsa03015 | mRNA surveillance pathway                   |
| hsa03018 | RNA degradation                             |
| hsa03020 | RNA polymerase                              |
| hsa03022 | Basal transcription factors                 |
| hsa03030 | DNA replication                             |
| hsa03040 | Spliceosome                                 |
| hsa03050 | Proteasome                                  |
| hsa03060 | Protein export                              |
| hsa03320 | PPAR signaling pathway                      |
| hsa03410 | Base excision repair                        |
| hsa03420 | Nucleotide excision repair                  |
| hsa03430 | Mismatch repair                             |
| hsa03440 | Homologous recombination                    |
| hsa03450 | Non-homologous end-joining                  |
| hsa04010 | MAPK signaling pathway                      |
| hsa04012 | ErbB signaling pathway                      |
| hsa04020 | Calcium signaling pathway                   |
| hsa04060 | Cytokine-cytokine receptor interaction      |
| hsa04062 | Chemokine signaling pathway                 |
| hsa04070 | Phosphatidylinositol signaling system       |
| hsa04080 | Neuroactive ligand-receptor interaction     |
| hsa04110 | Cell cycle                                  |
| hsa04114 | Oocyte meiosis                              |
| hsa04115 | p53 signaling pathway                       |
| hsa04120 | Ubiquitin mediated proteolysis              |
| hsa04122 | Sulfur relay system                         |
| hsa04130 | SNARE interactions in vesicular transport   |
| hsa04140 | Regulation of autophagy                     |
| hsa04141 | Protein processing in endoplasmic reticulum |
| hsa04142 | Lysosome                                    |
| hsa04144 | Endocytosis                                 |
| hsa04145 | Phagosome                                   |
| hsa04146 | Peroxisome                                  |
| hsa04150 | mTOR signaling pathway                      |
| hsa04210 | Apoptosis                                   |
| hsa04260 | Cardiac muscle contraction                  |

|          |                                              |
|----------|----------------------------------------------|
| hsa04270 | Vascular smooth muscle contraction           |
| hsa04310 | Wnt signaling pathway                        |
| hsa04320 | Dorso-ventral axis formation                 |
| hsa04330 | Notch signaling pathway                      |
| hsa04340 | Hedgehog signaling pathway                   |
| hsa04350 | TGF-beta signaling pathway                   |
| hsa04360 | Axon guidance                                |
| hsa04370 | VEGF signaling pathway                       |
| hsa04380 | Osteoclast differentiation                   |
| hsa04510 | Focal adhesion                               |
| hsa04512 | ECM-receptor interaction                     |
| hsa04514 | Cell adhesion molecules (CAMs)               |
| hsa04520 | Adherens junction                            |
| hsa04530 | Tight junction                               |
| hsa04540 | Gap junction                                 |
| hsa04610 | Complement and coagulation cascades          |
| hsa04612 | Antigen processing and presentation          |
| hsa04614 | Renin-angiotensin system                     |
| hsa04620 | Toll-like receptor signaling pathway         |
| hsa04621 | NOD-like receptor signaling pathway          |
| hsa04622 | RIG-I-like receptor signaling pathway        |
| hsa04623 | Cytosolic DNA-sensing pathway                |
| hsa04630 | Jak-STAT signaling pathway                   |
| hsa04640 | Hematopoietic cell lineage                   |
| hsa04650 | Natural killer cell mediated cytotoxicity    |
| hsa04660 | T cell receptor signaling pathway            |
| hsa04662 | B cell receptor signaling pathway            |
| hsa04664 | Fc epsilon RI signaling pathway              |
| hsa04666 | Fc gamma R-mediated phagocytosis             |
| hsa04670 | Leukocyte transendothelial migration         |
| hsa04672 | Intestinal immune network for IgA production |
| hsa04710 | Circadian rhythm - mammal                    |
| hsa04720 | Long-term potentiation                       |
| hsa04722 | Neurotrophin signaling pathway               |
| hsa04730 | Long-term depression                         |
| hsa04740 | Olfactory transduction                       |
| hsa04742 | Taste transduction                           |
| hsa04744 | Phototransduction                            |
| hsa04810 | Regulation of actin cytoskeleton             |
| hsa04910 | Insulin signaling pathway                    |
| hsa04912 | GnRH signaling pathway                       |
| hsa04914 | Progesterone-mediated oocyte maturation      |
| hsa04916 | Melanogenesis                                |

|          |                                                            |
|----------|------------------------------------------------------------|
| hsa04920 | Adipocytokine signaling pathway                            |
| hsa04930 | Type II diabetes mellitus                                  |
| hsa04940 | Type I diabetes mellitus                                   |
| hsa04950 | Maturity onset diabetes of the young                       |
| hsa04960 | Aldosterone-regulated sodium reabsorption                  |
| hsa04962 | Vasopressin-regulated water reabsorption                   |
| hsa04964 | Proximal tubule bicarbonate reclamation                    |
| hsa04966 | Collecting duct acid secretion                             |
| hsa04970 | Salivary secretion                                         |
| hsa04971 | Gastric acid secretion                                     |
| hsa04972 | Pancreatic secretion                                       |
| hsa04973 | Carbohydrate digestion and absorption                      |
| hsa04974 | Protein digestion and absorption                           |
| hsa04975 | Fat digestion and absorption                               |
| hsa04976 | Bile secretion                                             |
| hsa04977 | Vitamin digestion and absorption                           |
| hsa05010 | Alzheimer's disease                                        |
| hsa05012 | Parkinson's disease                                        |
| hsa05014 | Amyotrophic lateral sclerosis (ALS)                        |
| hsa05016 | Huntington's disease                                       |
| hsa05020 | Prion diseases                                             |
| hsa05100 | Bacterial invasion of epithelial cells                     |
| hsa05110 | Vibrio cholerae infection                                  |
| hsa05120 | Epithelial cell signaling in Helicobacter pylori infection |
| hsa05130 | Pathogenic Escherichia coli infection                      |
| hsa05131 | Shigellosis                                                |
| hsa05140 | Leishmaniasis                                              |
| hsa05142 | Chagas disease (American trypanosomiasis)                  |
| hsa05143 | African trypanosomiasis                                    |
| hsa05144 | Malaria                                                    |
| hsa05145 | Toxoplasmosis                                              |
| hsa05146 | Amoebiasis                                                 |
| hsa05150 | Staphylococcus aureus infection                            |
| hsa05160 | Hepatitis C                                                |
| hsa05200 | Pathways in cancer                                         |
| hsa05210 | Colorectal cancer                                          |
| hsa05211 | Renal cell carcinoma                                       |
| hsa05212 | Pancreatic cancer                                          |
| hsa05213 | Endometrial cancer                                         |
| hsa05214 | Glioma                                                     |
| hsa05215 | Prostate cancer                                            |
| hsa05216 | Thyroid cancer                                             |
| hsa05217 | Basal cell carcinoma                                       |

|          |                                                        |
|----------|--------------------------------------------------------|
| hsa05218 | Melanoma                                               |
| hsa05219 | Bladder cancer                                         |
| hsa05220 | Chronic myeloid leukemia                               |
| hsa05221 | Acute myeloid leukemia                                 |
| hsa05222 | Small cell lung cancer                                 |
| hsa05223 | Non-small cell lung cancer                             |
| hsa05310 | Asthma                                                 |
| hsa05320 | Autoimmune thyroid disease                             |
| hsa05322 | Systemic lupus erythematosus                           |
| hsa05323 | Rheumatoid arthritis                                   |
| hsa05330 | Allograft rejection                                    |
| hsa05332 | Graft-versus-host disease                              |
| hsa05340 | Primary immunodeficiency                               |
| hsa05410 | Hypertrophic cardiomyopathy (HCM)                      |
| hsa05412 | Arrhythmogenic right ventricular cardiomyopathy (ARVC) |
| hsa05414 | Dilated cardiomyopathy                                 |
| hsa05416 | Viral myocarditis                                      |
