# Supplementary material for: Prediction of Effective Drug Combinations by Chemical Interaction, Protein Interaction and Target Enrichment of KEGG Pathways
Source: Hindawi journal article supplement (doi:10.1155/2013/723780), 2013-01-01
Supplement: f4 [file 723780.f4.pdf]

**Supplementary Material IV: Detailed data in IFS curve and AUC scores**

| Number of features | Sensitivity (SN) | Specificity (SP) | Prediction accuracy (ACC) | Matthews's correlation coefficient (MCC) | AUC score |
|--------------------|------------------|------------------|---------------------------|------------------------------------------|-----------|
| 4                  | 0.6694           | 0.9372           | 0.8926                    | 0.6107                                   | 0.8116    |
| 5                  | 0.6777           | 0.9488           | 0.9036                    | 0.644                                    | 0.8156    |
| 6                  | 0.6281           | 0.9455           | 0.8926                    | 0.5984                                   | 0.8286    |
| 7                  | 0.686            | 0.9455           | 0.9022                    | 0.6422                                   | 0.8622    |
| 8                  | 0.6942           | 0.9455           | 0.9036                    | 0.6484                                   | 0.8509    |
| 9                  | 0.686            | 0.9455           | 0.9022                    | 0.6422                                   | 0.8602    |
| 10                 | 0.6612           | 0.9521           | 0.9036                    | 0.6398                                   | 0.8539    |
| 11                 | 0.6364           | 0.9421           | 0.8912                    | 0.5969                                   | 0.8523    |
| 12                 | 0.6364           | 0.9537           | 0.9008                    | 0.6252                                   | 0.8802    |
| 13                 | 0.6446           | 0.957            | 0.905                     | 0.64                                     | 0.8753    |
| 14                 | 0.6446           | 0.9455           | 0.8953                    | 0.6111                                   | 0.8684    |
| 15                 | 0.6777           | 0.9421           | 0.8981                    | 0.6283                                   | 0.8616    |
| 16                 | 0.6446           | 0.9471           | 0.8967                    | 0.6151                                   | 0.8754    |
| 17                 | 0.6694           | 0.9471           | 0.9008                    | 0.6338                                   | 0.8861    |
| 18                 | 0.6529           | 0.9521           | 0.9022                    | 0.6336                                   | 0.8684    |
| 19                 | 0.6198           | 0.9521           | 0.8967                    | 0.6084                                   | 0.8847    |
| 20                 | 0.6281           | 0.9521           | 0.8981                    | 0.6147                                   | 0.8659    |
| 21                 | 0.6364           | 0.9504           | 0.8981                    | 0.6169                                   | 0.8583    |
| 22                 | 0.6364           | 0.9488           | 0.8967                    | 0.6128                                   | 0.8562    |
| 23                 | 0.6281           | 0.9471           | 0.8939                    | 0.6024                                   | 0.8781    |
| 24                 | 0.6116           | 0.9521           | 0.8953                    | 0.602                                    | 0.8573    |
| 25                 | 0.595            | 0.9554           | 0.8953                    | 0.5977                                   | 0.8809    |
| 26                 | 0.6033           | 0.957            | 0.8981                    | 0.6085                                   | 0.8606    |
| 27                 | 0.595            | 0.9554           | 0.8953                    | 0.5977                                   | 0.8639    |
| 28                 | 0.6116           | 0.9488           | 0.8926                    | 0.5937                                   | 0.8672    |
| 29                 | 0.6033           | 0.9488           | 0.8912                    | 0.5873                                   | 0.8501    |
| 30                 | 0.6446           | 0.9554           | 0.9036                    | 0.6357                                   | 0.8509    |
| 31                 | 0.6694           | 0.957            | 0.9091                    | 0.6586                                   | 0.8860    |
| 32                 | 0.6364           | 0.962            | 0.9077                    | 0.647                                    | 0.8773    |
| 33                 | 0.6198           | 0.9537           | 0.8981                    | 0.6126                                   | 0.8455    |
| 34                 | 0.5702           | 0.957            | 0.8926                    | 0.5827                                   | 0.8784    |
| 35                 | 0.5785           | 0.9554           | 0.8926                    | 0.5848                                   | 0.8614    |
| 36                 | 0.5785           | 0.9587           | 0.8953                    | 0.5936                                   | 0.8497    |
| 37                 | 0.5537           | 0.962            | 0.8939                    | 0.5832                                   | 0.8716    |
| 38                 | 0.6033           | 0.962            | 0.9022                    | 0.6219                                   | 0.8507    |
| 39                 | 0.6364           | 0.9471           | 0.8953                    | 0.6087                                   | 0.9005    |

|    |        |        |        |        |        |
|----|--------|--------|--------|--------|--------|
| 40 | 0.6364 | 0.9488 | 0.8967 | 0.6128 | 0.8704 |
| 41 | 0.6198 | 0.9636 | 0.9063 | 0.6391 | 0.8864 |
| 42 | 0.6116 | 0.9521 | 0.8953 | 0.602  | 0.8815 |
| 43 | 0.6116 | 0.9587 | 0.9008 | 0.6193 | 0.8355 |
| 44 | 0.6281 | 0.9554 | 0.9008 | 0.6232 | 0.8403 |
| 45 | 0.6198 | 0.9554 | 0.8994 | 0.6169 | 0.8492 |
| 46 | 0.5702 | 0.9587 | 0.8939 | 0.5871 | 0.8476 |
| 47 | 0.5785 | 0.9686 | 0.9036 | 0.6217 | 0.8690 |
| 48 | 0.5868 | 0.9603 | 0.8981 | 0.6046 | 0.8588 |
| 49 | 0.5537 | 0.9554 | 0.8884 | 0.5651 | 0.8341 |
| 50 | 0.5785 | 0.9636 | 0.8994 | 0.6074 | 0.8716 |
| 51 | 0.562  | 0.9719 | 0.9036 | 0.6188 | 0.8617 |
| 52 | 0.5868 | 0.9471 | 0.8871 | 0.5702 | 0.8713 |
| 53 | 0.5455 | 0.9521 | 0.8843 | 0.5498 | 0.8639 |
| 54 | 0.595  | 0.9521 | 0.8926 | 0.5892 | 0.8228 |
| 55 | 0.6529 | 0.9669 | 0.9146 | 0.6731 | 0.8803 |
| 56 | 0.5537 | 0.962  | 0.8939 | 0.5832 | 0.8546 |
| 57 | 0.6033 | 0.957  | 0.8981 | 0.6085 | 0.8602 |
| 58 | 0.6033 | 0.9603 | 0.9008 | 0.6174 | 0.8586 |
| 59 | 0.595  | 0.9669 | 0.905  | 0.6296 | 0.8412 |
| 60 | 0.5124 | 0.962  | 0.8871 | 0.5499 | 0.8314 |
| 61 | 0.5537 | 0.962  | 0.8939 | 0.5832 | 0.8391 |
| 62 | 0.5455 | 0.9537 | 0.8857 | 0.5541 | 0.8607 |
| 63 | 0.5455 | 0.9669 | 0.8967 | 0.5909 | 0.8765 |
| 64 | 0.6116 | 0.957  | 0.8994 | 0.6149 | 0.8772 |
| 65 | 0.595  | 0.9719 | 0.9091 | 0.6442 | 0.8646 |
| 66 | 0.5455 | 0.9669 | 0.8967 | 0.5909 | 0.8692 |
| 67 | 0.5868 | 0.9554 | 0.8939 | 0.5913 | 0.8499 |
| 68 | 0.5702 | 0.9521 | 0.8884 | 0.5697 | 0.8496 |
| 69 | 0.5041 | 0.9669 | 0.8898 | 0.5576 | 0.8648 |
| 70 | 0.5289 | 0.9521 | 0.8815 | 0.5364 | 0.8547 |
| 71 | 0.5702 | 0.9537 | 0.8898 | 0.5739 | 0.8511 |
| 72 | 0.5785 | 0.9537 | 0.8912 | 0.5805 | 0.8631 |
| 73 | 0.6281 | 0.9554 | 0.9008 | 0.6232 | 0.8687 |
| 74 | 0.5455 | 0.9636 | 0.8939 | 0.5813 | 0.8732 |
| 75 | 0.5868 | 0.9636 | 0.9008 | 0.6138 | 0.8645 |
| 76 | 0.5702 | 0.9603 | 0.8953 | 0.5917 | 0.8566 |
| 77 | 0.5455 | 0.9636 | 0.8939 | 0.5813 | 0.8209 |
| 78 | 0.5207 | 0.9603 | 0.8871 | 0.5519 | 0.8562 |

|     |        |        |        |        |        |
|-----|--------|--------|--------|--------|--------|
| 79  | 0.5537 | 0.9653 | 0.8967 | 0.5926 | 0.8457 |
| 80  | 0.4793 | 0.9636 | 0.8829 | 0.5272 | 0.8379 |
| 81  | 0.5041 | 0.9603 | 0.8843 | 0.5384 | 0.8584 |
| 82  | 0.5289 | 0.9636 | 0.8912 | 0.5681 | 0.8441 |
| 83  | 0.5207 | 0.9603 | 0.8871 | 0.5519 | 0.8504 |
| 84  | 0.5372 | 0.9587 | 0.8884 | 0.5608 | 0.8364 |
| 85  | 0.5785 | 0.9686 | 0.9036 | 0.6217 | 0.8562 |
| 86  | 0.4876 | 0.9421 | 0.8664 | 0.4771 | 0.8480 |
| 87  | 0.5702 | 0.9587 | 0.8939 | 0.5871 | 0.8689 |
| 88  | 0.4793 | 0.9587 | 0.8788 | 0.513  | 0.8313 |
| 89  | 0.4876 | 0.9587 | 0.8802 | 0.52   | 0.8368 |
| 90  | 0.5041 | 0.962  | 0.8857 | 0.5431 | 0.8474 |
| 91  | 0.5289 | 0.9603 | 0.8884 | 0.5587 | 0.8601 |
| 92  | 0.4959 | 0.962  | 0.8843 | 0.5362 | 0.8468 |
| 93  | 0.5537 | 0.962  | 0.8939 | 0.5832 | 0.8484 |
| 94  | 0.5207 | 0.9554 | 0.8829 | 0.5383 | 0.8225 |
| 95  | 0.4711 | 0.9587 | 0.8774 | 0.506  | 0.8309 |
| 96  | 0.5537 | 0.9702 | 0.9008 | 0.6073 | 0.8377 |
| 97  | 0.5455 | 0.9636 | 0.8939 | 0.5813 | 0.8588 |
| 98  | 0.5207 | 0.9521 | 0.8802 | 0.5296 | 0.8178 |
| 99  | 0.5124 | 0.9636 | 0.8884 | 0.5546 | 0.8377 |
| 100 | 0.5455 | 0.9603 | 0.8912 | 0.572  | 0.8422 |
| 101 | 0.5455 | 0.9521 | 0.8843 | 0.5498 | 0.8539 |
| 102 | 0.5289 | 0.9521 | 0.8815 | 0.5364 | 0.8281 |
| 103 | 0.562  | 0.9587 | 0.8926 | 0.5806 | 0.8369 |
| 104 | 0.5041 | 0.9636 | 0.8871 | 0.5478 | 0.8542 |
| 105 | 0.5207 | 0.957  | 0.8843 | 0.5428 | 0.8148 |
| 106 | 0.5785 | 0.962  | 0.8981 | 0.6027 | 0.8311 |
| 107 | 0.5124 | 0.9587 | 0.8843 | 0.5406 | 0.8400 |
| 108 | 0.5289 | 0.957  | 0.8857 | 0.5496 | 0.8065 |
| 109 | 0.5207 | 0.962  | 0.8884 | 0.5566 | 0.8528 |
| 110 | 0.5124 | 0.9636 | 0.8884 | 0.5546 | 0.8433 |
| 111 | 0.4793 | 0.9686 | 0.8871 | 0.5421 | 0.8204 |
| 112 | 0.5124 | 0.9603 | 0.8857 | 0.5452 | 0.8064 |
| 113 | 0.4959 | 0.9603 | 0.8829 | 0.5315 | 0.8287 |
| 114 | 0.5041 | 0.9587 | 0.8829 | 0.5337 | 0.8032 |
| 115 | 0.5041 | 0.9587 | 0.8829 | 0.5337 | 0.8223 |
| 116 | 0.5207 | 0.9504 | 0.8788 | 0.5253 | 0.8192 |
| 117 | 0.4876 | 0.9603 | 0.8815 | 0.5246 | 0.8398 |

|     |        |        |        |        |        |
|-----|--------|--------|--------|--------|--------|
| 118 | 0.5289 | 0.9537 | 0.8829 | 0.5407 | 0.8096 |
| 119 | 0.4711 | 0.962  | 0.8802 | 0.5154 | 0.7855 |
| 120 | 0.5124 | 0.9669 | 0.8912 | 0.5644 | 0.8237 |
| 121 | 0.4793 | 0.9603 | 0.8802 | 0.5177 | 0.8023 |
| 122 | 0.5041 | 0.9521 | 0.8774 | 0.5159 | 0.8425 |
| 123 | 0.4959 | 0.962  | 0.8843 | 0.5362 | 0.8428 |
| 124 | 0.5372 | 0.9587 | 0.8884 | 0.5608 | 0.8397 |
| 125 | 0.4876 | 0.9603 | 0.8815 | 0.5246 | 0.7988 |
| 126 | 0.4628 | 0.957  | 0.8747 | 0.4943 | 0.8114 |
| 127 | 0.5289 | 0.9669 | 0.8939 | 0.5777 | 0.8470 |
| 128 | 0.4876 | 0.9537 | 0.876  | 0.5064 | 0.7780 |
| 129 | 0.4711 | 0.9736 | 0.8898 | 0.551  | 0.8042 |
| 130 | 0.4876 | 0.9603 | 0.8815 | 0.5246 | 0.8348 |
| 131 | 0.4793 | 0.9603 | 0.8802 | 0.5177 | 0.8396 |
| 132 | 0.5455 | 0.9636 | 0.8939 | 0.5813 | 0.8493 |
| 133 | 0.5289 | 0.9653 | 0.8926 | 0.5729 | 0.8288 |
| 134 | 0.5124 | 0.962  | 0.8871 | 0.5499 | 0.8198 |
| 135 | 0.5124 | 0.9521 | 0.8788 | 0.5228 | 0.8474 |
| 136 | 0.4793 | 0.9702 | 0.8884 | 0.5473 | 0.7918 |
| 137 | 0.4959 | 0.9537 | 0.8774 | 0.5134 | 0.8227 |
| 138 | 0.4545 | 0.9636 | 0.8788 | 0.5061 | 0.8170 |
| 139 | 0.5537 | 0.9554 | 0.8884 | 0.5651 | 0.8160 |
| 140 | 0.5455 | 0.9636 | 0.8939 | 0.5813 | 0.8258 |
| 141 | 0.4959 | 0.9603 | 0.8829 | 0.5315 | 0.8083 |
| 142 | 0.5041 | 0.9686 | 0.8912 | 0.5626 | 0.8161 |
| 143 | 0.5537 | 0.9686 | 0.8994 | 0.6024 | 0.8238 |
| 144 | 0.5124 | 0.9471 | 0.8747 | 0.5101 | 0.8061 |
| 145 | 0.5537 | 0.9702 | 0.9008 | 0.6073 | 0.8381 |
| 146 | 0.5041 | 0.962  | 0.8857 | 0.5431 | 0.8176 |
| 147 | 0.5289 | 0.9603 | 0.8884 | 0.5587 | 0.8025 |
| 148 | 0.4711 | 0.9603 | 0.8788 | 0.5107 | 0.8101 |
| 149 | 0.5041 | 0.957  | 0.8815 | 0.5292 | 0.8335 |
| 150 | 0.4959 | 0.9636 | 0.8857 | 0.541  | 0.8471 |
| 151 | 0.4876 | 0.9603 | 0.8815 | 0.5246 | 0.8012 |
| 152 | 0.5207 | 0.9554 | 0.8829 | 0.5383 | 0.8226 |
| 153 | 0.5207 | 0.9603 | 0.8871 | 0.5519 | 0.8038 |
| 154 | 0.4876 | 0.9653 | 0.8857 | 0.539  | 0.8013 |
| 155 | 0.5124 | 0.9686 | 0.8926 | 0.5694 | 0.8240 |
| 156 | 0.5041 | 0.9537 | 0.8788 | 0.5203 | 0.8017 |

|     |        |        |        |        |        |
|-----|--------|--------|--------|--------|--------|
| 157 | 0.5289 | 0.9669 | 0.8939 | 0.5777 | 0.8321 |
| 158 | 0.4876 | 0.957  | 0.8788 | 0.5154 | 0.8207 |
| 159 | 0.5041 | 0.9636 | 0.8871 | 0.5478 | 0.8284 |
| 160 | 0.5041 | 0.9669 | 0.8898 | 0.5576 | 0.8409 |
| 161 | 0.4545 | 0.9702 | 0.8843 | 0.5264 | 0.7927 |
| 162 | 0.5124 | 0.957  | 0.8829 | 0.536  | 0.8075 |
| 163 | 0.4711 | 0.9554 | 0.8747 | 0.4969 | 0.8056 |
| 164 | 0.4876 | 0.9587 | 0.8802 | 0.52   | 0.8337 |
| 165 | 0.4876 | 0.962  | 0.8829 | 0.5293 | 0.7906 |
| 166 | 0.5041 | 0.9587 | 0.8829 | 0.5337 | 0.8193 |
| 167 | 0.5207 | 0.962  | 0.8884 | 0.5566 | 0.8127 |
| 168 | 0.4628 | 0.9653 | 0.8815 | 0.5181 | 0.8154 |
| 169 | 0.4959 | 0.962  | 0.8843 | 0.5362 | 0.8303 |
| 170 | 0.5289 | 0.957  | 0.8857 | 0.5496 | 0.8255 |
| 171 | 0.4711 | 0.9521 | 0.8719 | 0.488  | 0.7476 |
| 172 | 0.5207 | 0.9537 | 0.8815 | 0.5339 | 0.8393 |
| 173 | 0.4959 | 0.9669 | 0.8884 | 0.5508 | 0.8112 |
| 174 | 0.4711 | 0.9603 | 0.8788 | 0.5107 | 0.8173 |
| 175 | 0.5124 | 0.962  | 0.8871 | 0.5499 | 0.8259 |
| 176 | 0.4876 | 0.9537 | 0.876  | 0.5064 | 0.7990 |
| 177 | 0.4545 | 0.957  | 0.8733 | 0.4872 | 0.8207 |
| 178 | 0.4628 | 0.9587 | 0.876  | 0.4989 | 0.7648 |
| 179 | 0.4959 | 0.9752 | 0.8953 | 0.5768 | 0.8184 |
| 180 | 0.4959 | 0.957  | 0.8802 | 0.5223 | 0.8238 |
| 181 | 0.5041 | 0.9471 | 0.8733 | 0.5032 | 0.8161 |
| 182 | 0.4628 | 0.9653 | 0.8815 | 0.5181 | 0.8101 |
| 183 | 0.4876 | 0.962  | 0.8829 | 0.5293 | 0.8126 |
| 184 | 0.4711 | 0.9603 | 0.8788 | 0.5107 | 0.7751 |
| 185 | 0.4628 | 0.9636 | 0.8802 | 0.5132 | 0.8014 |
| 186 | 0.4711 | 0.9587 | 0.8774 | 0.506  | 0.8051 |
| 187 | 0.5124 | 0.9554 | 0.8815 | 0.5315 | 0.7956 |
| 188 | 0.4793 | 0.9603 | 0.8802 | 0.5177 | 0.8229 |
| 189 | 0.4628 | 0.9669 | 0.8829 | 0.5231 | 0.8023 |
| 190 | 0.4711 | 0.962  | 0.8802 | 0.5154 | 0.7906 |
| 191 | 0.4545 | 0.9636 | 0.8788 | 0.5061 | 0.7898 |
| 192 | 0.4876 | 0.9702 | 0.8898 | 0.5542 | 0.8167 |
| 193 | 0.4545 | 0.9653 | 0.8802 | 0.5111 | 0.8167 |
| 194 | 0.4793 | 0.962  | 0.8815 | 0.5224 | 0.8277 |
| 195 | 0.5124 | 0.9636 | 0.8884 | 0.5546 | 0.7960 |

|     |        |        |        |        |        |
|-----|--------|--------|--------|--------|--------|
| 196 | 0.5289 | 0.9702 | 0.8967 | 0.5877 | 0.8107 |
| 197 | 0.4711 | 0.9736 | 0.8898 | 0.551  | 0.7959 |
| 198 | 0.4793 | 0.962  | 0.8815 | 0.5224 | 0.8163 |
| 199 | 0.4793 | 0.9702 | 0.8884 | 0.5473 | 0.8011 |
| 200 | 0.4628 | 0.9603 | 0.8774 | 0.5036 | 0.7660 |
| 201 | 0.4463 | 0.9653 | 0.8788 | 0.504  | 0.8004 |
| 202 | 0.4876 | 0.9653 | 0.8857 | 0.539  | 0.8303 |
| 203 | 0.4793 | 0.9719 | 0.8898 | 0.5525 | 0.7943 |
| 204 | 0.5041 | 0.9702 | 0.8926 | 0.5677 | 0.8475 |
| 205 | 0.4545 | 0.9603 | 0.876  | 0.4965 | 0.7930 |
| 206 | 0.5207 | 0.9603 | 0.8871 | 0.5519 | 0.7997 |
| 207 | 0.4545 | 0.9636 | 0.8788 | 0.5061 | 0.7529 |
| 208 | 0.4876 | 0.9653 | 0.8857 | 0.539  | 0.8011 |
| 209 | 0.4628 | 0.9769 | 0.8912 | 0.5551 | 0.8111 |
| 210 | 0.4628 | 0.9636 | 0.8802 | 0.5132 | 0.8052 |
| 211 | 0.5207 | 0.9636 | 0.8898 | 0.5614 | 0.8039 |
| 212 | 0.4463 | 0.9587 | 0.8733 | 0.4846 | 0.7856 |
| 213 | 0.5124 | 0.9669 | 0.8912 | 0.5644 | 0.8187 |
| 214 | 0.4793 | 0.9603 | 0.8802 | 0.5177 | 0.7984 |
| 215 | 0.4463 | 0.9686 | 0.8815 | 0.5141 | 0.7775 |
| 216 | 0.4215 | 0.9669 | 0.876  | 0.4873 | 0.7647 |
| 217 | 0.4793 | 0.9702 | 0.8884 | 0.5473 | 0.7843 |
| 218 | 0.4711 | 0.9653 | 0.8829 | 0.5252 | 0.7918 |
| 219 | 0.4959 | 0.962  | 0.8843 | 0.5362 | 0.8346 |
| 220 | 0.4793 | 0.9702 | 0.8884 | 0.5473 | 0.8136 |
| 221 | 0.4711 | 0.9603 | 0.8788 | 0.5107 | 0.7605 |
| 222 | 0.4793 | 0.9636 | 0.8829 | 0.5272 | 0.8142 |
| 223 | 0.4463 | 0.9636 | 0.8774 | 0.499  | 0.7954 |
| 224 | 0.4628 | 0.957  | 0.8747 | 0.4943 | 0.7646 |
| 225 | 0.4711 | 0.9669 | 0.8843 | 0.5301 | 0.7826 |
| 226 | 0.438  | 0.9669 | 0.8788 | 0.5018 | 0.7882 |
| 227 | 0.4876 | 0.9636 | 0.8843 | 0.5341 | 0.8075 |
| 228 | 0.4298 | 0.962  | 0.8733 | 0.4797 | 0.8106 |
| 229 | 0.5041 | 0.9669 | 0.8898 | 0.5576 | 0.7973 |
| 230 | 0.5041 | 0.9603 | 0.8843 | 0.5384 | 0.7578 |
| 231 | 0.4711 | 0.9587 | 0.8774 | 0.506  | 0.7987 |
| 232 | 0.4959 | 0.9686 | 0.8898 | 0.5558 | 0.8223 |
| 233 | 0.4545 | 0.9587 | 0.8747 | 0.4918 | 0.7736 |
| 234 | 0.4793 | 0.9669 | 0.8857 | 0.5371 | 0.7831 |

|     |        |        |        |        |        |
|-----|--------|--------|--------|--------|--------|
| 235 | 0.5124 | 0.9587 | 0.8843 | 0.5406 | 0.8214 |
| 236 | 0.4711 | 0.9653 | 0.8829 | 0.5252 | 0.7971 |
| 237 | 0.4545 | 0.9653 | 0.8802 | 0.5111 | 0.7968 |
| 238 | 0.4628 | 0.9636 | 0.8802 | 0.5132 | 0.7775 |
| 239 | 0.5207 | 0.9636 | 0.8898 | 0.5614 | 0.8046 |
| 240 | 0.4793 | 0.9603 | 0.8802 | 0.5177 | 0.8038 |
| 241 | 0.5207 | 0.957  | 0.8843 | 0.5428 | 0.8232 |
| 242 | 0.4711 | 0.957  | 0.876  | 0.5014 | 0.7842 |
| 243 | 0.4628 | 0.9636 | 0.8802 | 0.5132 | 0.7995 |
| 244 | 0.4793 | 0.9702 | 0.8884 | 0.5473 | 0.7812 |
| 245 | 0.4298 | 0.9752 | 0.8843 | 0.5214 | 0.7626 |
| 246 | 0.5207 | 0.9587 | 0.8857 | 0.5473 | 0.7854 |
| 247 | 0.4711 | 0.9587 | 0.8774 | 0.506  | 0.8028 |
| 248 | 0.4711 | 0.9603 | 0.8788 | 0.5107 | 0.7905 |
| 249 | 0.4793 | 0.9636 | 0.8829 | 0.5272 | 0.7709 |
| 250 | 0.4132 | 0.9636 | 0.8719 | 0.4699 | 0.7835 |
| 251 | 0.4876 | 0.9521 | 0.8747 | 0.502  | 0.7858 |
| 252 | 0.4628 | 0.9653 | 0.8815 | 0.5181 | 0.7598 |
| 253 | 0.4876 | 0.9702 | 0.8898 | 0.5542 | 0.7971 |
| 254 | 0.4793 | 0.9554 | 0.876  | 0.5039 | 0.7558 |
| 255 | 0.4628 | 0.9554 | 0.8733 | 0.4898 | 0.7963 |
| 256 | 0.438  | 0.962  | 0.8747 | 0.4869 | 0.7486 |
| 257 | 0.4793 | 0.9587 | 0.8788 | 0.513  | 0.7614 |
| 258 | 0.4959 | 0.962  | 0.8843 | 0.5362 | 0.7961 |
| 259 | 0.4793 | 0.962  | 0.8815 | 0.5224 | 0.7979 |
| 260 | 0.4298 | 0.9603 | 0.8719 | 0.4749 | 0.8050 |
| 261 | 0.4463 | 0.9587 | 0.8733 | 0.4846 | 0.7924 |
| 262 | 0.4876 | 0.962  | 0.8829 | 0.5293 | 0.8037 |
| 263 | 0.438  | 0.9587 | 0.8719 | 0.4774 | 0.7808 |
| 264 | 0.4628 | 0.9603 | 0.8774 | 0.5036 | 0.8141 |
| 265 | 0.4793 | 0.9669 | 0.8857 | 0.5371 | 0.7806 |
| 266 | 0.4959 | 0.9669 | 0.8884 | 0.5508 | 0.8166 |
| 267 | 0.4711 | 0.962  | 0.8802 | 0.5154 | 0.7557 |
| 268 | 0.4628 | 0.9636 | 0.8802 | 0.5132 | 0.8213 |
| 269 | 0.4793 | 0.957  | 0.8774 | 0.5084 | 0.7710 |
| 270 | 0.4298 | 0.9554 | 0.8678 | 0.4609 | 0.7722 |
| 271 | 0.4876 | 0.9636 | 0.8843 | 0.5341 | 0.7858 |
| 272 | 0.4628 | 0.9719 | 0.8871 | 0.5387 | 0.7733 |
| 273 | 0.4628 | 0.957  | 0.8747 | 0.4943 | 0.8007 |

|     |        |        |        |        |        |
|-----|--------|--------|--------|--------|--------|
| 274 | 0.4959 | 0.9554 | 0.8788 | 0.5178 | 0.8056 |
| 275 | 0.4545 | 0.9702 | 0.8843 | 0.5264 | 0.7950 |
| 276 | 0.4628 | 0.962  | 0.8788 | 0.5084 | 0.7695 |
| 277 | 0.4711 | 0.962  | 0.8802 | 0.5154 | 0.7734 |
| 278 | 0.4793 | 0.9669 | 0.8857 | 0.5371 | 0.7830 |
| 279 | 0.4628 | 0.9653 | 0.8815 | 0.5181 | 0.7607 |
| 280 | 0.4628 | 0.957  | 0.8747 | 0.4943 | 0.7637 |
| 281 | 0.4959 | 0.9587 | 0.8815 | 0.5269 | 0.8150 |
| 282 | 0.4793 | 0.9554 | 0.876  | 0.5039 | 0.7804 |
| 283 | 0.4793 | 0.9686 | 0.8871 | 0.5421 | 0.8114 |
| 284 | 0.4793 | 0.962  | 0.8815 | 0.5224 | 0.7609 |
| 285 | 0.4545 | 0.9719 | 0.8857 | 0.5317 | 0.8017 |
| 286 | 0.4298 | 0.9669 | 0.8774 | 0.4946 | 0.7363 |
| 287 | 0.4628 | 0.9686 | 0.8843 | 0.5282 | 0.8053 |
| 288 | 0.4545 | 0.9653 | 0.8802 | 0.5111 | 0.7932 |
| 289 | 0.4876 | 0.962  | 0.8829 | 0.5293 | 0.8092 |
| 290 | 0.4545 | 0.9587 | 0.8747 | 0.4918 | 0.7489 |
| 291 | 0.4628 | 0.962  | 0.8788 | 0.5084 | 0.7823 |
| 292 | 0.4628 | 0.9603 | 0.8774 | 0.5036 | 0.7785 |
| 293 | 0.4793 | 0.957  | 0.8774 | 0.5084 | 0.8193 |
| 294 | 0.4793 | 0.9603 | 0.8802 | 0.5177 | 0.7829 |
| 295 | 0.4298 | 0.9669 | 0.8774 | 0.4946 | 0.7858 |
| 296 | 0.4793 | 0.9587 | 0.8788 | 0.513  | 0.8118 |
| 297 | 0.4628 | 0.9719 | 0.8871 | 0.5387 | 0.7719 |
| 298 | 0.4793 | 0.9537 | 0.8747 | 0.4994 | 0.7882 |
| 299 | 0.4463 | 0.9686 | 0.8815 | 0.5141 | 0.7550 |
| 300 | 0.4545 | 0.9603 | 0.876  | 0.4965 | 0.7774 |
| 301 | 0.4711 | 0.9587 | 0.8774 | 0.506  | 0.7702 |
| 302 | 0.5041 | 0.9669 | 0.8898 | 0.5576 | 0.8213 |
| 303 | 0.4545 | 0.9554 | 0.8719 | 0.4826 | 0.7528 |
| 304 | 0.4793 | 0.9636 | 0.8829 | 0.5272 | 0.7757 |
| 305 | 0.4628 | 0.9653 | 0.8815 | 0.5181 | 0.7990 |
| 306 | 0.4959 | 0.9686 | 0.8898 | 0.5558 | 0.7891 |
| 307 | 0.4876 | 0.9636 | 0.8843 | 0.5341 | 0.7869 |
| 308 | 0.4711 | 0.9603 | 0.8788 | 0.5107 | 0.7731 |
| 309 | 0.4463 | 0.962  | 0.876  | 0.4941 | 0.7517 |
| 310 | 0.5124 | 0.9603 | 0.8857 | 0.5452 | 0.7789 |
| 311 | 0.4959 | 0.9669 | 0.8884 | 0.5508 | 0.8267 |
| 312 | 0.5041 | 0.9653 | 0.8884 | 0.5527 | 0.8126 |



|     |        |        |        |        |        |
|-----|--------|--------|--------|--------|--------|
| 313 | 0.4711 | 0.9686 | 0.8857 | 0.5352 | 0.8040 |
| 314 | 0.4463 | 0.9653 | 0.8788 | 0.504  | 0.7812 |
| 315 | 0.438  | 0.957  | 0.8705 | 0.4728 | 0.7734 |
| 316 | 0.4793 | 0.962  | 0.8815 | 0.5224 | 0.7648 |
| 317 | 0.4628 | 0.9636 | 0.8802 | 0.5132 | 0.7819 |
| 318 | 0.4545 | 0.9636 | 0.8788 | 0.5061 | 0.7644 |
| 319 | 0.4959 | 0.962  | 0.8843 | 0.5362 | 0.7903 |
| 320 | 0.4876 | 0.9702 | 0.8898 | 0.5542 | 0.7973 |
| 321 | 0.4793 | 0.9587 | 0.8788 | 0.513  | 0.7910 |
| 322 | 0.4545 | 0.9669 | 0.8815 | 0.5161 | 0.8138 |
| 323 | 0.4298 | 0.9653 | 0.876  | 0.4895 | 0.7746 |
| 324 | 0.4793 | 0.9554 | 0.876  | 0.5039 | 0.7657 |
| 325 | 0.4876 | 0.9653 | 0.8857 | 0.539  | 0.7863 |
| 326 | 0.4463 | 0.9636 | 0.8774 | 0.499  | 0.7612 |
| 327 | 0.4793 | 0.9554 | 0.876  | 0.5039 | 0.7842 |
| 328 | 0.4628 | 0.9686 | 0.8843 | 0.5282 | 0.7990 |
| 329 | 0.5207 | 0.9653 | 0.8912 | 0.5662 | 0.7744 |
| 330 | 0.4711 | 0.9636 | 0.8815 | 0.5202 | 0.7933 |
| 331 | 0.4711 | 0.9686 | 0.8857 | 0.5352 | 0.7656 |
| 332 | 0.4298 | 0.9636 | 0.8747 | 0.4846 | 0.7686 |
| 333 | 0.5041 | 0.9554 | 0.8802 | 0.5247 | 0.7835 |
| 334 | 0.4959 | 0.9587 | 0.8815 | 0.5269 | 0.8154 |
| 335 | 0.4545 | 0.9686 | 0.8829 | 0.5212 | 0.7910 |
| 336 | 0.4959 | 0.962  | 0.8843 | 0.5362 | 0.8126 |
| 337 | 0.4463 | 0.9636 | 0.8774 | 0.499  | 0.7859 |
| 338 | 0.4545 | 0.962  | 0.8774 | 0.5013 | 0.7658 |
| 339 | 0.4545 | 0.957  | 0.8733 | 0.4872 | 0.7967 |
| 340 | 0.4876 | 0.9636 | 0.8843 | 0.5341 | 0.7988 |
| 341 | 0.4628 | 0.957  | 0.8747 | 0.4943 | 0.7722 |
| 342 | 0.4628 | 0.9603 | 0.8774 | 0.5036 | 0.7956 |
| 343 | 0.4545 | 0.9669 | 0.8815 | 0.5161 | 0.7395 |
| 344 | 0.405  | 0.962  | 0.8691 | 0.4575 | 0.8103 |
| 345 | 0.4959 | 0.9636 | 0.8857 | 0.541  | 0.7812 |
| 346 | 0.4463 | 0.9653 | 0.8788 | 0.504  | 0.7504 |
| 347 | 0.4711 | 0.9636 | 0.8815 | 0.5202 | 0.7312 |
| 348 | 0.4711 | 0.9603 | 0.8788 | 0.5107 | 0.7591 |
| 349 | 0.4711 | 0.9554 | 0.8747 | 0.4969 | 0.7534 |
| 350 | 0.4545 | 0.9653 | 0.8802 | 0.5111 | 0.7291 |
| 351 | 0.4793 | 0.962  | 0.8815 | 0.5224 | 0.7377 |

|     |        |        |        |        |        |
|-----|--------|--------|--------|--------|--------|
| 352 | 0.4463 | 0.9653 | 0.8788 | 0.504  | 0.7963 |
| 353 | 0.4876 | 0.9603 | 0.8815 | 0.5246 | 0.7845 |
| 354 | 0.4959 | 0.9719 | 0.8926 | 0.5662 | 0.7629 |
| 355 | 0.5124 | 0.9504 | 0.8774 | 0.5185 | 0.8158 |
| 356 | 0.4463 | 0.9603 | 0.8747 | 0.4893 | 0.7576 |
| 357 | 0.4711 | 0.957  | 0.876  | 0.5014 | 0.7338 |
| 358 | 0.4793 | 0.9636 | 0.8829 | 0.5272 | 0.8033 |
| 359 | 0.4298 | 0.962  | 0.8733 | 0.4797 | 0.7262 |
| 360 | 0.4711 | 0.9587 | 0.8774 | 0.506  | 0.7942 |
| 361 | 0.4628 | 0.9653 | 0.8815 | 0.5181 | 0.7811 |
| 362 | 0.4959 | 0.9702 | 0.8912 | 0.561  | 0.8182 |
| 363 | 0.4793 | 0.9537 | 0.8747 | 0.4994 | 0.7600 |
| 364 | 0.4545 | 0.9686 | 0.8829 | 0.5212 | 0.7747 |
| 365 | 0.4876 | 0.9537 | 0.876  | 0.5064 | 0.7779 |
| 366 | 0.4711 | 0.9653 | 0.8829 | 0.5252 | 0.7423 |
| 367 | 0.4876 | 0.962  | 0.8829 | 0.5293 | 0.7797 |
| 368 | 0.4711 | 0.9554 | 0.8747 | 0.4969 | 0.8130 |
| 369 | 0.4628 | 0.9603 | 0.8774 | 0.5036 | 0.7625 |
| 370 | 0.4876 | 0.9504 | 0.8733 | 0.4977 | 0.7396 |
| 371 | 0.4876 | 0.9653 | 0.8857 | 0.539  | 0.8166 |
| 372 | 0.4876 | 0.9653 | 0.8857 | 0.539  | 0.7585 |
| 373 | 0.4711 | 0.9587 | 0.8774 | 0.506  | 0.7543 |
| 374 | 0.4215 | 0.9669 | 0.876  | 0.4873 | 0.7746 |
| 375 | 0.3967 | 0.9554 | 0.8623 | 0.4311 | 0.7201 |
| 376 | 0.4876 | 0.9636 | 0.8843 | 0.5341 | 0.7638 |
| 377 | 0.438  | 0.9636 | 0.876  | 0.4918 | 0.7837 |
| 378 | 0.4545 | 0.9554 | 0.8719 | 0.4826 | 0.7545 |
| 379 | 0.4876 | 0.9669 | 0.8871 | 0.544  | 0.8007 |
| 380 | 0.4793 | 0.962  | 0.8815 | 0.5224 | 0.7991 |
| 381 | 0.4545 | 0.9636 | 0.8788 | 0.5061 | 0.7394 |
| 382 | 0.4628 | 0.962  | 0.8788 | 0.5084 | 0.7741 |
| 383 | 0.4959 | 0.9669 | 0.8884 | 0.5508 | 0.8143 |
| 384 | 0.4711 | 0.9686 | 0.8857 | 0.5352 | 0.7678 |
| 385 | 0.438  | 0.9636 | 0.876  | 0.4918 | 0.7401 |
| 386 | 0.4628 | 0.9537 | 0.8719 | 0.4853 | 0.7658 |
| 387 | 0.4959 | 0.9669 | 0.8884 | 0.5508 | 0.7728 |
| 388 | 0.405  | 0.9669 | 0.8733 | 0.4726 | 0.7345 |
| 389 | 0.4545 | 0.9603 | 0.876  | 0.4965 | 0.7777 |
| 390 | 0.5041 | 0.9686 | 0.8912 | 0.5626 | 0.7511 |

|     |        |        |        |        |        |
|-----|--------|--------|--------|--------|--------|
| 391 | 0.438  | 0.9554 | 0.8691 | 0.4682 | 0.7653 |
| 392 | 0.4545 | 0.957  | 0.8733 | 0.4872 | 0.7982 |
| 393 | 0.4876 | 0.9554 | 0.8774 | 0.5109 | 0.7894 |
| 394 | 0.4545 | 0.9537 | 0.8705 | 0.4782 | 0.7650 |
| 395 | 0.4545 | 0.962  | 0.8774 | 0.5013 | 0.7839 |
| 396 | 0.4545 | 0.9653 | 0.8802 | 0.5111 | 0.7245 |
| 397 | 0.4463 | 0.9669 | 0.8802 | 0.509  | 0.7796 |
| 398 | 0.4545 | 0.962  | 0.8774 | 0.5013 | 0.7884 |
| 399 | 0.438  | 0.9603 | 0.8733 | 0.4821 | 0.7664 |
| 400 | 0.4298 | 0.9636 | 0.8747 | 0.4846 | 0.7649 |
| 401 | 0.4545 | 0.9603 | 0.876  | 0.4965 | 0.7802 |
| 402 | 0.4463 | 0.9603 | 0.8747 | 0.4893 | 0.7773 |
| 403 | 0.4959 | 0.957  | 0.8802 | 0.5223 | 0.7502 |
| 404 | 0.438  | 0.9636 | 0.876  | 0.4918 | 0.7592 |
| 405 | 0.3967 | 0.9653 | 0.8705 | 0.46   | 0.7575 |
| 406 | 0.4545 | 0.9554 | 0.8719 | 0.4826 | 0.7289 |
| 407 | 0.4628 | 0.9587 | 0.876  | 0.4989 | 0.7814 |
| 408 | 0.4876 | 0.9587 | 0.8802 | 0.52   | 0.7865 |
| 409 | 0.4545 | 0.9669 | 0.8815 | 0.5161 | 0.7702 |
| 410 | 0.4876 | 0.9636 | 0.8843 | 0.5341 | 0.7897 |
| 411 | 0.4545 | 0.9719 | 0.8857 | 0.5317 | 0.7490 |
| 412 | 0.4876 | 0.962  | 0.8829 | 0.5293 | 0.7601 |
| 413 | 0.4628 | 0.9603 | 0.8774 | 0.5036 | 0.7804 |
| 414 | 0.438  | 0.9686 | 0.8802 | 0.507  | 0.7651 |
| 415 | 0.4711 | 0.962  | 0.8802 | 0.5154 | 0.7685 |
| 416 | 0.405  | 0.9686 | 0.8747 | 0.4778 | 0.7616 |
| 417 | 0.4463 | 0.9603 | 0.8747 | 0.4893 | 0.7606 |
| 418 | 0.4298 | 0.9653 | 0.876  | 0.4895 | 0.7841 |
| 419 | 0.4132 | 0.9669 | 0.8747 | 0.48   | 0.7655 |
| 420 | 0.4628 | 0.9686 | 0.8843 | 0.5282 | 0.7751 |
| 421 | 0.4545 | 0.9603 | 0.876  | 0.4965 | 0.7968 |
| 422 | 0.4793 | 0.9669 | 0.8857 | 0.5371 | 0.7641 |
| 423 | 0.4463 | 0.962  | 0.876  | 0.4941 | 0.7930 |
| 424 | 0.4545 | 0.962  | 0.8774 | 0.5013 | 0.7549 |
| 425 | 0.4545 | 0.9554 | 0.8719 | 0.4826 | 0.7511 |
| 426 | 0.4463 | 0.9603 | 0.8747 | 0.4893 | 0.7222 |
| 427 | 0.4215 | 0.9636 | 0.8733 | 0.4773 | 0.7527 |
| 428 | 0.4628 | 0.9587 | 0.876  | 0.4989 | 0.7685 |
| 429 | 0.4711 | 0.9636 | 0.8815 | 0.5202 | 0.7796 |

|     |        |        |        |        |        |
|-----|--------|--------|--------|--------|--------|
| 430 | 0.4463 | 0.962  | 0.876  | 0.4941 | 0.7577 |
| 431 | 0.4463 | 0.957  | 0.8719 | 0.48   | 0.7650 |
| 432 | 0.4793 | 0.9603 | 0.8802 | 0.5177 | 0.7565 |
| 433 | 0.4711 | 0.9603 | 0.8788 | 0.5107 | 0.7986 |
| 434 | 0.4628 | 0.9653 | 0.8815 | 0.5181 | 0.7661 |
| 435 | 0.4545 | 0.9636 | 0.8788 | 0.5061 | 0.7685 |
| 436 | 0.4545 | 0.9636 | 0.8788 | 0.5061 | 0.7564 |
| 437 | 0.4876 | 0.9587 | 0.8802 | 0.52   | 0.7899 |
| 438 | 0.4711 | 0.9587 | 0.8774 | 0.506  | 0.7586 |
| 439 | 0.4711 | 0.9669 | 0.8843 | 0.5301 | 0.7957 |
| 440 | 0.4132 | 0.9752 | 0.8815 | 0.507  | 0.7469 |
| 441 | 0.4545 | 0.9587 | 0.8747 | 0.4918 | 0.7591 |
| 442 | 0.4711 | 0.9636 | 0.8815 | 0.5202 | 0.7868 |
| 443 | 0.4711 | 0.9669 | 0.8843 | 0.5301 | 0.7386 |
| 444 | 0.4545 | 0.962  | 0.8774 | 0.5013 | 0.7720 |
| 445 | 0.5124 | 0.957  | 0.8829 | 0.536  | 0.7504 |
| 446 | 0.4876 | 0.957  | 0.8788 | 0.5154 | 0.7470 |
| 447 | 0.4463 | 0.957  | 0.8719 | 0.48   | 0.7600 |
| 448 | 0.4793 | 0.9669 | 0.8857 | 0.5371 | 0.7868 |
| 449 | 0.438  | 0.9653 | 0.8774 | 0.4968 | 0.7423 |
| 450 | 0.438  | 0.957  | 0.8705 | 0.4728 | 0.7261 |
| 451 | 0.4711 | 0.9587 | 0.8774 | 0.506  | 0.7555 |
| 452 | 0.4628 | 0.9603 | 0.8774 | 0.5036 | 0.7369 |
| 453 | 0.4711 | 0.962  | 0.8802 | 0.5154 | 0.8000 |
| 454 | 0.4711 | 0.962  | 0.8802 | 0.5154 | 0.7501 |
| 455 | 0.438  | 0.9636 | 0.876  | 0.4918 | 0.8025 |
| 456 | 0.4628 | 0.9702 | 0.8857 | 0.5334 | 0.7572 |
| 457 | 0.4793 | 0.9636 | 0.8829 | 0.5272 | 0.7573 |
| 458 | 0.4215 | 0.9587 | 0.8691 | 0.4628 | 0.7725 |
| 459 | 0.4793 | 0.9669 | 0.8857 | 0.5371 | 0.7383 |
| 460 | 0.4628 | 0.957  | 0.8747 | 0.4943 | 0.7905 |
| 461 | 0.4463 | 0.9636 | 0.8774 | 0.499  | 0.7900 |
| 462 | 0.4793 | 0.9554 | 0.876  | 0.5039 | 0.7624 |
| 463 | 0.5041 | 0.9554 | 0.8802 | 0.5247 | 0.7728 |
| 464 | 0.4545 | 0.9653 | 0.8802 | 0.5111 | 0.7590 |
| 465 | 0.4463 | 0.9653 | 0.8788 | 0.504  | 0.7788 |
